# Supplementary material for: The Biological Function Delineated Across Pan-Cancer Levels Through lncRNA-Based Prognostic Risk Assessment Factors for Pancreatic Cancer
Source: Front Cell Dev Biol. 2021 Jun 14;9:694652. doi: 10.3389/fcell.2021.694652 (PMC8236889; doi:10.3389/fcell.2021.694652)
Supplement: Supplementary file 2 [file Table_1.XLSX]

## Sheet: MIR600HG.cor
gene1	gene2	gene2Type	cor	pvalue
MIR600HG	CTC1	protein_coding	0.739	1.13321e-32
MIR600HG	ZMAT1	protein_coding	0.706	1.00371e-28
MIR600HG	CCDC180	protein_coding	0.701	3.28797e-28
MIR600HG	SPATS2L	protein_coding	-0.698	7.24044e-28
MIR600HG	SGSM2	protein_coding	0.697	8.52262e-28
MIR600HG	GPS2	protein_coding	0.689	5.31851e-27
MIR600HG	UBAP1L	protein_coding	0.682	2.98028e-26
MIR600HG	IQCN	protein_coding	0.682	3.06001e-26
MIR600HG	RBM5	protein_coding	0.675	1.48466e-25
MIR600HG	NEURL4	protein_coding	0.674	1.79888e-25
MIR600HG	USP20	protein_coding	0.674	2.06752e-25
MIR600HG	ZNF814	protein_coding	0.673	2.20227e-25
MIR600HG	TUBGCP6	protein_coding	0.672	2.9547e-25
MIR600HG	ZBTB40	protein_coding	0.671	3.37383e-25
MIR600HG	PPP1R3E	protein_coding	0.669	5.74891e-25
MIR600HG	P2RX5-TAX1BP3	protein_coding	0.667	7.94389e-25
MIR600HG	GP1BA	protein_coding	0.664	1.56303e-24
MIR600HG	PLEK2	protein_coding	-0.662	2.40881e-24
MIR600HG	CCDC62	protein_coding	0.66	3.93746e-24
MIR600HG	RALB	protein_coding	-0.66	3.99586e-24
MIR600HG	MET	protein_coding	-0.657	7.7857e-24
MIR600HG	CTNNA1	protein_coding	-0.655	1.01436e-23
MIR600HG	CBX7	protein_coding	0.654	1.2682e-23
MIR600HG	MYH3	protein_coding	0.653	1.75607e-23
MIR600HG	CARMIL2	protein_coding	0.652	2.1983e-23
MIR600HG	EML6	protein_coding	0.647	6.31848e-23
MIR600HG	SNX22	protein_coding	0.64	2.30967e-22
MIR600HG	SH2D4A	protein_coding	-0.64	2.49575e-22
MIR600HG	CRIP3	protein_coding	0.638	3.42249e-22
MIR600HG	PASK	protein_coding	0.638	3.62026e-22
MIR600HG	CCDC188	protein_coding	0.638	3.79433e-22
MIR600HG	TTC21A	protein_coding	0.635	5.67405e-22
MIR600HG	SEC31B	protein_coding	0.633	8.9337e-22
MIR600HG	SLC2A11	protein_coding	0.627	3.0848e-21
MIR600HG	ZDHHC5	protein_coding	-0.626	3.38996e-21
MIR600HG	MASP2	protein_coding	0.625	4.5084e-21
MIR600HG	ZNF540	protein_coding	0.623	5.43027e-21
MIR600HG	LAMB3	protein_coding	-0.623	5.8812e-21
MIR600HG	BFAR	protein_coding	-0.622	6.80863e-21
MIR600HG	ASPH	protein_coding	-0.621	9.14036e-21
MIR600HG	MOCOS	protein_coding	-0.62	1.08831e-20
MIR600HG	ITGB5	protein_coding	-0.619	1.14716e-20
MIR600HG	SLC44A1	protein_coding	-0.618	1.51286e-20
MIR600HG	CYB561D1	protein_coding	0.618	1.53037e-20
MIR600HG	SDR39U1	protein_coding	0.618	1.54978e-20
MIR600HG	TMBIM1	protein_coding	-0.617	1.8822e-20
MIR600HG	ADAM9	protein_coding	-0.616	2.21679e-20
MIR600HG	CRTC1	protein_coding	0.616	2.2884e-20
MIR600HG	CYFIP2	protein_coding	0.615	2.63994e-20
MIR600HG	S100A11	protein_coding	-0.613	3.57854e-20
MIR600HG	FERMT1	protein_coding	-0.613	3.80603e-20
MIR600HG	ZNF862	protein_coding	0.613	3.82829e-20
MIR600HG	KLF5	protein_coding	-0.612	4.04547e-20
MIR600HG	RAC1	protein_coding	-0.612	4.17654e-20
MIR600HG	SLC25A42	protein_coding	0.612	4.38387e-20
MIR600HG	CIRBP	protein_coding	0.612	4.48556e-20
MIR600HG	TMC5	protein_coding	-0.611	4.84887e-20
MIR600HG	LINGO3	protein_coding	0.611	5.08314e-20
MIR600HG	ZBTB25	protein_coding	0.611	5.18904e-20
MIR600HG	LDHA	protein_coding	-0.611	5.67689e-20
MIR600HG	ZNF76	protein_coding	0.608	9.53678e-20
MIR600HG	CHMP2B	protein_coding	-0.607	9.74766e-20
MIR600HG	KCNK1	protein_coding	-0.607	1.01174e-19
MIR600HG	ING5	protein_coding	0.606	1.27867e-19
MIR600HG	ANXA3	protein_coding	-0.606	1.29999e-19
MIR600HG	C6orf163	protein_coding	0.605	1.51753e-19
MIR600HG	TMEM92	protein_coding	-0.604	1.62999e-19
MIR600HG	KDELR3	protein_coding	-0.604	1.64138e-19
MIR600HG	STAG3	protein_coding	0.604	1.92041e-19
MIR600HG	EIF5A2	protein_coding	-0.603	2.12087e-19
MIR600HG	REELD1	protein_coding	0.603	2.27705e-19
MIR600HG	DIAPH2	protein_coding	-0.602	2.39391e-19
MIR600HG	LGALS3	protein_coding	-0.602	2.53256e-19
MIR600HG	CYFIP1	protein_coding	-0.602	2.65341e-19
MIR600HG	GALNT5	protein_coding	-0.602	2.68192e-19
MIR600HG	VAMP1	protein_coding	0.6	3.54492e-19
MIR600HG	ITGA6	protein_coding	-0.599	3.88517e-19
MIR600HG	FAM117A	protein_coding	0.599	4.09263e-19
MIR600HG	GPRC5A	protein_coding	-0.599	4.43429e-19
MIR600HG	QSOX1	protein_coding	-0.599	4.44906e-19
MIR600HG	EZH1	protein_coding	0.598	4.88226e-19
MIR600HG	FAM184B	protein_coding	0.598	4.94001e-19
MIR600HG	DPH1	protein_coding	0.598	5.07045e-19
MIR600HG	PNPLA7	protein_coding	0.598	5.29569e-19
MIR600HG	MYOF	protein_coding	-0.597	5.62357e-19
MIR600HG	ACAP1	protein_coding	0.597	5.99791e-19
MIR600HG	MTERF4	protein_coding	0.596	7.16219e-19
MIR600HG	SUGP2	protein_coding	0.596	7.37892e-19
MIR600HG	SLC26A11	protein_coding	0.595	7.76846e-19
MIR600HG	ZNF594	protein_coding	0.595	8.48113e-19
MIR600HG	DRC3	protein_coding	0.595	8.64067e-19
MIR600HG	SFN	protein_coding	-0.594	1.03041e-18
MIR600HG	PLBD1	protein_coding	-0.593	1.21763e-18
MIR600HG	SLC39A1	protein_coding	-0.592	1.31665e-18
MIR600HG	TPM4	protein_coding	-0.592	1.36095e-18
MIR600HG	ANKLE1	protein_coding	0.591	1.49115e-18
MIR600HG	PRRG1	protein_coding	-0.591	1.54158e-18
MIR600HG	SEPT1	protein_coding	0.591	1.56511e-18
MIR600HG	GGA2	protein_coding	0.591	1.64359e-18
MIR600HG	MRPL3	protein_coding	-0.59	1.88681e-18
MIR600HG	ADORA2A	protein_coding	0.59	2.01525e-18
MIR600HG	UCP3	protein_coding	0.59	2.0227e-18
MIR600HG	TSPYL2	protein_coding	0.589	2.15153e-18
MIR600HG	RIC3	protein_coding	0.589	2.27518e-18
MIR600HG	ZDHHC9	protein_coding	-0.589	2.36774e-18
MIR600HG	TMEM87A	protein_coding	-0.588	2.59039e-18
MIR600HG	LACTB	protein_coding	-0.588	2.70011e-18
MIR600HG	RBM6	protein_coding	0.588	2.70893e-18
MIR600HG	F2RL1	protein_coding	-0.587	2.97849e-18
MIR600HG	BCL11A	protein_coding	0.586	3.43309e-18
MIR600HG	COQ10A	protein_coding	0.586	3.44889e-18
MIR600HG	PNMA3	protein_coding	0.586	3.53955e-18
MIR600HG	STRADA	protein_coding	0.585	3.93142e-18
MIR600HG	ZNF266	protein_coding	0.585	4.01445e-18
MIR600HG	SAFB2	protein_coding	0.585	4.21134e-18
MIR600HG	SLC2A10	protein_coding	-0.585	4.4427e-18
MIR600HG	CUL9	protein_coding	0.584	5.30556e-18
MIR600HG	EXT1	protein_coding	-0.582	6.96606e-18
MIR600HG	C10orf143	protein_coding	0.582	7.02835e-18
MIR600HG	ANTXR2	protein_coding	-0.581	8.24733e-18
MIR600HG	RBP5	protein_coding	0.581	8.3963e-18
MIR600HG	RAB1A	protein_coding	-0.58	9.24436e-18
MIR600HG	EI24	protein_coding	-0.58	9.99295e-18
MIR600HG	NIPSNAP3B	protein_coding	0.579	1.09717e-17
MIR600HG	PTGFRN	protein_coding	-0.578	1.26278e-17
MIR600HG	S100A16	protein_coding	-0.578	1.27227e-17
MIR600HG	FOXQ1	protein_coding	-0.578	1.36853e-17
MIR600HG	CALU	protein_coding	-0.577	1.4335e-17
MIR600HG	PCDH1	protein_coding	-0.577	1.48331e-17
MIR600HG	S100A10	protein_coding	-0.577	1.62801e-17
MIR600HG	DNHD1	protein_coding	0.576	1.65561e-17
MIR600HG	APLP2	protein_coding	-0.576	1.65772e-17
MIR600HG	MAST3	protein_coding	0.576	1.65953e-17
MIR600HG	EFCAB8	protein_coding	0.576	1.6622e-17
MIR600HG	LAMC2	protein_coding	-0.576	1.69354e-17
MIR600HG	INAVA	protein_coding	-0.575	2.01349e-17
MIR600HG	TMPRSS4	protein_coding	-0.575	2.06378e-17
MIR600HG	GLCCI1	protein_coding	0.574	2.29329e-17
MIR600HG	STAU1	protein_coding	-0.574	2.49106e-17
MIR600HG	ARMC10	protein_coding	-0.574	2.5326e-17
MIR600HG	CA12	protein_coding	-0.574	2.61087e-17
MIR600HG	ECT2	protein_coding	-0.573	2.65174e-17
MIR600HG	MSS51	protein_coding	0.573	2.77889e-17
MIR600HG	PLS3	protein_coding	-0.573	2.9e-17
MIR600HG	C12orf42	protein_coding	0.572	3.12071e-17
MIR600HG	FAM114A1	protein_coding	-0.572	3.27928e-17
MIR600HG	PLAUR	protein_coding	-0.572	3.3665e-17
MIR600HG	PHF7	protein_coding	0.572	3.38467e-17
MIR600HG	WDR37	protein_coding	0.571	3.6201e-17
MIR600HG	GRHL2	protein_coding	-0.571	3.6662e-17
MIR600HG	RPE	protein_coding	-0.571	3.66747e-17
MIR600HG	PAN2	protein_coding	0.571	3.73923e-17
MIR600HG	MYO1E	protein_coding	-0.571	3.86389e-17
MIR600HG	COLQ	protein_coding	0.571	4.14985e-17
MIR600HG	ZNF546	protein_coding	0.57	4.40819e-17
MIR600HG	MRNIP	protein_coding	0.57	4.56369e-17
MIR600HG	TSKU	protein_coding	-0.57	4.6618e-17
MIR600HG	NMD3	protein_coding	-0.57	4.81308e-17
MIR600HG	ASB16	protein_coding	0.569	4.90952e-17
MIR600HG	TMEM110-MUSTN1	protein_coding	0.569	5.1655e-17
MIR600HG	FAM129C	protein_coding	0.569	5.26102e-17
MIR600HG	PCNT	protein_coding	0.569	5.28639e-17
MIR600HG	FAM83B	protein_coding	-0.569	5.29706e-17
MIR600HG	ATG16L2	protein_coding	0.569	5.3209e-17
MIR600HG	YAP1	protein_coding	-0.569	5.37663e-17
MIR600HG	ZSCAN30	protein_coding	0.569	5.67264e-17
MIR600HG	AGPS	protein_coding	-0.568	5.863e-17
MIR600HG	CAPN2	protein_coding	-0.568	6.18328e-17
MIR600HG	PRSS8	protein_coding	-0.568	6.20596e-17
MIR600HG	PNISR	protein_coding	0.568	6.49644e-17
MIR600HG	REM2	protein_coding	0.567	6.64472e-17
MIR600HG	IL11RA	protein_coding	0.567	6.89511e-17
MIR600HG	ANO1	protein_coding	-0.567	6.93577e-17
MIR600HG	LRRC8E	protein_coding	-0.567	6.94295e-17
MIR600HG	NISCH	protein_coding	0.567	6.98739e-17
MIR600HG	STK3	protein_coding	-0.567	7.21646e-17
MIR600HG	AC068896.1	protein_coding	0.567	7.35725e-17
MIR600HG	SDC4	protein_coding	-0.566	7.90689e-17
MIR600HG	SLC16A1	protein_coding	-0.566	8.13394e-17
MIR600HG	TMC7	protein_coding	-0.566	8.14737e-17
MIR600HG	ANXA2	protein_coding	-0.566	8.32598e-17
MIR600HG	NBPF12	protein_coding	0.566	8.66199e-17
MIR600HG	APBB3	protein_coding	0.566	8.85296e-17
MIR600HG	GNG7	protein_coding	0.566	8.86488e-17
MIR600HG	NPPA	protein_coding	0.565	9.01167e-17
MIR600HG	EXOG	protein_coding	0.565	9.2268e-17
MIR600HG	PRCD	protein_coding	0.565	9.38792e-17
MIR600HG	LAMA3	protein_coding	-0.565	9.4492e-17
MIR600HG	DENND4B	protein_coding	0.565	9.97577e-17
MIR600HG	ARL6IP1	protein_coding	-0.565	1.0377e-16
MIR600HG	FAM69B	protein_coding	0.564	1.07418e-16
MIR600HG	ANLN	protein_coding	-0.564	1.09842e-16
MIR600HG	ADGRF3	protein_coding	0.564	1.15339e-16
MIR600HG	SARM1	protein_coding	0.564	1.16918e-16
MIR600HG	TPBG	protein_coding	-0.564	1.18332e-16
MIR600HG	EXT2	protein_coding	-0.564	1.18542e-16
MIR600HG	KDELR2	protein_coding	-0.563	1.22559e-16
MIR600HG	VAMP2	protein_coding	0.563	1.27028e-16
MIR600HG	VDR	protein_coding	-0.563	1.2807e-16
MIR600HG	SSPO	protein_coding	0.563	1.28133e-16
MIR600HG	TUBA1C	protein_coding	-0.563	1.32403e-16
MIR600HG	S100A14	protein_coding	-0.563	1.35593e-16
MIR600HG	C6orf132	protein_coding	-0.563	1.38115e-16
MIR600HG	ADGRG5	protein_coding	0.563	1.40673e-16
MIR600HG	TSPOAP1	protein_coding	0.563	1.40766e-16
MIR600HG	VDAC1	protein_coding	-0.562	1.41614e-16
MIR600HG	PSEN1	protein_coding	-0.562	1.48711e-16
MIR600HG	PLIN3	protein_coding	-0.562	1.49258e-16
MIR600HG	ZCCHC18	protein_coding	0.562	1.53713e-16
MIR600HG	ITGB6	protein_coding	-0.562	1.57281e-16
MIR600HG	KCTD14	protein_coding	-0.562	1.62956e-16
MIR600HG	SERPINB5	protein_coding	-0.561	1.77028e-16
MIR600HG	ARF4	protein_coding	-0.561	1.81679e-16
MIR600HG	ZNF780B	protein_coding	0.561	1.86388e-16
MIR600HG	ITGA2	protein_coding	-0.56	2.05906e-16
MIR600HG	AC009690.1	protein_coding	0.56	2.10877e-16
MIR600HG	TCEANC	protein_coding	0.56	2.11902e-16
MIR600HG	NRIP2	protein_coding	0.56	2.20518e-16
MIR600HG	FAT1	protein_coding	-0.559	2.2524e-16
MIR600HG	MXRA5	protein_coding	-0.559	2.40472e-16
MIR600HG	LY6G5B	protein_coding	0.558	2.5755e-16
MIR600HG	RPAIN	protein_coding	0.558	2.57839e-16
MIR600HG	FAM53B	protein_coding	0.558	2.64563e-16
MIR600HG	LRRC59	protein_coding	-0.558	2.64816e-16
MIR600HG	PLPP2	protein_coding	-0.558	2.8075e-16
MIR600HG	SEC61A2	protein_coding	0.558	2.8384e-16
MIR600HG	STEAP1	protein_coding	-0.558	2.84322e-16
MIR600HG	C2orf92	protein_coding	0.557	3.08158e-16
MIR600HG	CRB2	protein_coding	0.557	3.13186e-16
MIR600HG	FBXO41	protein_coding	0.557	3.1829e-16
MIR600HG	CDCP1	protein_coding	-0.557	3.25809e-16
MIR600HG	ZBTB49	protein_coding	0.557	3.31623e-16
MIR600HG	PROX2	protein_coding	0.556	3.44333e-16
MIR600HG	NLRP1	protein_coding	0.556	3.45003e-16
MIR600HG	AGER	protein_coding	0.556	3.83003e-16
MIR600HG	SLC52A3	protein_coding	-0.556	3.91817e-16
MIR600HG	XKR4	protein_coding	0.555	4.00562e-16
MIR600HG	TGFA	protein_coding	-0.555	4.03769e-16
MIR600HG	FAM228B	protein_coding	0.555	4.06321e-16
MIR600HG	NXF1	protein_coding	0.555	4.16542e-16
MIR600HG	TRIM52	protein_coding	0.555	4.22046e-16
MIR600HG	REC8	protein_coding	0.555	4.27145e-16
MIR600HG	RALA	protein_coding	-0.554	4.80483e-16
MIR600HG	MLLT6	protein_coding	0.554	4.86313e-16
MIR600HG	ZNF708	protein_coding	0.554	5.18974e-16
MIR600HG	UNK	protein_coding	0.554	5.23621e-16
MIR600HG	DMAP1	protein_coding	0.554	5.23962e-16
MIR600HG	GJB3	protein_coding	-0.553	5.52647e-16
MIR600HG	NQO1	protein_coding	-0.553	5.57146e-16
MIR600HG	HRH1	protein_coding	-0.553	5.75061e-16
MIR600HG	FHL2	protein_coding	-0.553	5.7613e-16
MIR600HG	PYCR1	protein_coding	-0.553	5.92843e-16
MIR600HG	PPIC	protein_coding	-0.553	6.14155e-16
MIR600HG	NTN5	protein_coding	0.552	6.24339e-16
MIR600HG	PLCD3	protein_coding	-0.552	6.45702e-16
MIR600HG	CTNND1	protein_coding	-0.552	6.60807e-16
MIR600HG	A1BG	protein_coding	0.551	7.37917e-16
MIR600HG	KLF3	protein_coding	-0.551	7.99903e-16
MIR600HG	CSAD	protein_coding	0.551	8.04661e-16
MIR600HG	NFKBID	protein_coding	0.551	8.17413e-16
MIR600HG	TJP1	protein_coding	-0.55	8.39451e-16
MIR600HG	GJB2	protein_coding	-0.55	8.4842e-16
MIR600HG	SNX7	protein_coding	-0.55	8.56795e-16
MIR600HG	ANAPC2	protein_coding	0.55	8.71965e-16
MIR600HG	ABCA5	protein_coding	0.55	8.86078e-16
MIR600HG	SRD5A3	protein_coding	-0.55	9.1412e-16
MIR600HG	EFNB1	protein_coding	-0.549	9.72297e-16
MIR600HG	MPZL1	protein_coding	-0.549	1.01223e-15
MIR600HG	SMS	protein_coding	-0.549	1.0199e-15
MIR600HG	ZFP3	protein_coding	0.549	1.08815e-15
MIR600HG	CDRT4	protein_coding	0.549	1.095e-15
MIR600HG	ARMH1	protein_coding	0.548	1.13742e-15
MIR600HG	KRT19	protein_coding	-0.548	1.13935e-15
MIR600HG	HKDC1	protein_coding	-0.548	1.14762e-15
MIR600HG	DESI2	protein_coding	-0.548	1.17309e-15
MIR600HG	SDR16C5	protein_coding	-0.548	1.19833e-15
MIR600HG	ANKRD23	protein_coding	0.548	1.21074e-15
MIR600HG	ASB14	protein_coding	0.547	1.27403e-15
MIR600HG	ARMC12	protein_coding	0.547	1.41037e-15
MIR600HG	SDCBP2	protein_coding	-0.546	1.55492e-15
MIR600HG	TMEM144	protein_coding	-0.546	1.57203e-15
MIR600HG	ERBB2	protein_coding	-0.546	1.57252e-15
MIR600HG	COL17A1	protein_coding	-0.546	1.60047e-15
MIR600HG	KIAA1217	protein_coding	-0.546	1.60568e-15
MIR600HG	RNF149	protein_coding	-0.546	1.64735e-15
MIR600HG	SPG21	protein_coding	-0.546	1.66567e-15
MIR600HG	CEP55	protein_coding	-0.545	1.6877e-15
MIR600HG	CAPG	protein_coding	-0.545	1.69419e-15
MIR600HG	HNMT	protein_coding	-0.545	1.70141e-15
MIR600HG	ZNF248	protein_coding	0.545	1.70727e-15
MIR600HG	ESRP1	protein_coding	-0.545	1.72913e-15
MIR600HG	GIGYF1	protein_coding	0.545	1.74262e-15
MIR600HG	MUC1	protein_coding	-0.545	1.80548e-15
MIR600HG	TCTE3	protein_coding	0.545	1.85575e-15
MIR600HG	HMGA2	protein_coding	-0.544	2.08222e-15
MIR600HG	SLC1A5	protein_coding	-0.544	2.13405e-15
MIR600HG	KCNC3	protein_coding	0.544	2.17287e-15
MIR600HG	GPR75	protein_coding	0.544	2.22202e-15
MIR600HG	TFG	protein_coding	-0.544	2.2286e-15
MIR600HG	TEN1-CDK3	protein_coding	0.543	2.24041e-15
MIR600HG	NET1	protein_coding	-0.543	2.32604e-15
MIR600HG	ZNF397	protein_coding	0.543	2.38505e-15
MIR600HG	SLC6A20	protein_coding	-0.542	2.62907e-15
MIR600HG	LMO7	protein_coding	-0.542	2.87755e-15
MIR600HG	KLHDC1	protein_coding	0.541	3.06543e-15
MIR600HG	CNIH4	protein_coding	-0.541	3.2941e-15
MIR600HG	CCDC66	protein_coding	0.541	3.34804e-15
MIR600HG	U2AF1L4	protein_coding	0.54	3.61197e-15
MIR600HG	ZNF821	protein_coding	0.54	3.7192e-15
MIR600HG	DNAI2	protein_coding	0.54	3.7886e-15
MIR600HG	YWHAZ	protein_coding	-0.54	3.80229e-15
MIR600HG	CES4A	protein_coding	0.54	3.83059e-15
MIR600HG	INPP5B	protein_coding	0.54	3.85958e-15
MIR600HG	CREB3L1	protein_coding	-0.54	3.89212e-15
MIR600HG	EPS8	protein_coding	-0.54	3.89266e-15
MIR600HG	LIPH	protein_coding	-0.539	3.92902e-15
MIR600HG	TP53INP1	protein_coding	0.539	3.93065e-15
MIR600HG	PDLIM5	protein_coding	-0.539	3.9457e-15
MIR600HG	VPS26A	protein_coding	-0.539	4.0044e-15
MIR600HG	LAPTM4A	protein_coding	-0.539	4.17289e-15
MIR600HG	FAM184A	protein_coding	0.539	4.29515e-15
MIR600HG	ARNTL2	protein_coding	-0.539	4.2962e-15
MIR600HG	CLIC1	protein_coding	-0.539	4.35477e-15
MIR600HG	MECOM	protein_coding	-0.539	4.38238e-15
MIR600HG	CLK4	protein_coding	0.538	4.49327e-15
MIR600HG	ERMARD	protein_coding	0.538	4.51806e-15
MIR600HG	METTL3	protein_coding	0.538	4.53331e-15
MIR600HG	PLGLB1	protein_coding	0.538	4.58288e-15
MIR600HG	STK38L	protein_coding	-0.538	4.67869e-15
MIR600HG	LAD1	protein_coding	-0.538	4.71506e-15
MIR600HG	TNFRSF12A	protein_coding	-0.538	4.72446e-15
MIR600HG	HK2	protein_coding	-0.538	4.79748e-15
MIR600HG	AL157935.2	protein_coding	0.538	4.80628e-15
MIR600HG	SH3RF2	protein_coding	-0.538	4.85956e-15
MIR600HG	PEX13	protein_coding	-0.538	4.94803e-15
MIR600HG	ZNF671	protein_coding	0.538	4.99706e-15
MIR600HG	SPTY2D1	protein_coding	-0.538	5.02655e-15
MIR600HG	EVL	protein_coding	0.537	5.1497e-15
MIR600HG	EPHA2	protein_coding	-0.537	5.49537e-15
MIR600HG	ATP2A3	protein_coding	0.536	6.08992e-15
MIR600HG	CAMTA2	protein_coding	0.536	6.11579e-15
MIR600HG	TCF7L2	protein_coding	-0.536	6.27097e-15
MIR600HG	CLSTN3	protein_coding	0.536	6.28196e-15
MIR600HG	ZNF589	protein_coding	0.536	6.33896e-15
MIR600HG	OASL	protein_coding	-0.536	6.39227e-15
MIR600HG	CTSE	protein_coding	-0.536	6.52695e-15
MIR600HG	GORASP2	protein_coding	-0.535	6.80734e-15
MIR600HG	APOL1	protein_coding	-0.535	6.83326e-15
MIR600HG	LRRC1	protein_coding	-0.535	6.84788e-15
MIR600HG	ACTRT3	protein_coding	-0.535	7.11641e-15
MIR600HG	GTF2E2	protein_coding	-0.535	7.20213e-15
MIR600HG	RAB39B	protein_coding	0.535	7.44415e-15
MIR600HG	STEAP3	protein_coding	-0.535	7.53426e-15
MIR600HG	GALNT3	protein_coding	-0.535	7.5793e-15
MIR600HG	SSR3	protein_coding	-0.535	7.63933e-15
MIR600HG	RASEF	protein_coding	-0.534	8.08782e-15
MIR600HG	PLS1	protein_coding	-0.534	8.13827e-15
MIR600HG	ACSL6	protein_coding	0.534	8.25461e-15
MIR600HG	PANX1	protein_coding	-0.534	8.53822e-15
MIR600HG	SGMS2	protein_coding	-0.533	9.89203e-15
MIR600HG	OR13A1	protein_coding	0.533	9.98268e-15
MIR600HG	UNKL	protein_coding	0.533	9.9985e-15
MIR600HG	PTPN12	protein_coding	-0.532	1.02968e-14
MIR600HG	DIAPH3	protein_coding	-0.532	1.02985e-14
MIR600HG	KNOP1	protein_coding	-0.532	1.03662e-14
MIR600HG	C21orf58	protein_coding	0.532	1.10334e-14
MIR600HG	ATXN7L2	protein_coding	0.532	1.10346e-14
MIR600HG	B3GNT5	protein_coding	-0.531	1.30369e-14
MIR600HG	ANO6	protein_coding	-0.531	1.30933e-14
MIR600HG	NLRC3	protein_coding	0.531	1.31843e-14
MIR600HG	SLC25A45	protein_coding	0.531	1.31972e-14
MIR600HG	PIK3CB	protein_coding	-0.531	1.33094e-14
MIR600HG	INPP5E	protein_coding	0.53	1.45517e-14
MIR600HG	MTHFD1	protein_coding	-0.53	1.46898e-14
MIR600HG	NUP210	protein_coding	0.529	1.54978e-14
MIR600HG	HDLBP	protein_coding	-0.529	1.57181e-14
MIR600HG	TM4SF1	protein_coding	-0.529	1.66484e-14
MIR600HG	SCNN1A	protein_coding	-0.529	1.67908e-14
MIR600HG	TRMT10B	protein_coding	0.529	1.69195e-14
MIR600HG	ACTL6A	protein_coding	-0.529	1.69794e-14
MIR600HG	SEC14L5	protein_coding	0.529	1.7341e-14
MIR600HG	PTTG1IP	protein_coding	-0.528	1.77728e-14
MIR600HG	PACSIN1	protein_coding	0.528	1.84483e-14
MIR600HG	DPY19L2	protein_coding	0.528	1.85348e-14
MIR600HG	AGAP6	protein_coding	0.528	1.88391e-14
MIR600HG	PCF11	protein_coding	0.528	1.91495e-14
MIR600HG	MRPL19	protein_coding	-0.528	1.91931e-14
MIR600HG	FBXO9	protein_coding	0.528	1.97929e-14
MIR600HG	ITGB4	protein_coding	-0.528	1.99166e-14
MIR600HG	ZNF596	protein_coding	0.527	2.02217e-14
MIR600HG	CORO1C	protein_coding	-0.527	2.03623e-14
MIR600HG	MMADHC	protein_coding	-0.527	2.09261e-14
MIR600HG	FBF1	protein_coding	0.527	2.15723e-14
MIR600HG	NOL9	protein_coding	0.527	2.19039e-14
MIR600HG	MST1R	protein_coding	-0.527	2.22764e-14
MIR600HG	RAB10	protein_coding	-0.526	2.37908e-14
MIR600HG	CCDC154	protein_coding	0.526	2.45209e-14
MIR600HG	TNS4	protein_coding	-0.526	2.46817e-14
MIR600HG	DDX5	protein_coding	0.526	2.52143e-14
MIR600HG	ZNF709	protein_coding	0.526	2.57103e-14
MIR600HG	SLC25A27	protein_coding	0.526	2.58762e-14
MIR600HG	CARMIL3	protein_coding	0.525	2.61442e-14
MIR600HG	H1F0	protein_coding	-0.525	2.63046e-14
MIR600HG	PDZK1IP1	protein_coding	-0.525	2.64726e-14
MIR600HG	EIF5B	protein_coding	-0.525	2.70946e-14
MIR600HG	IFI27	protein_coding	-0.525	2.71452e-14
MIR600HG	S100P	protein_coding	-0.525	2.85759e-14
MIR600HG	FUT3	protein_coding	-0.525	2.87989e-14
MIR600HG	TRIM29	protein_coding	-0.525	2.90606e-14
MIR600HG	C12orf76	protein_coding	0.525	2.91765e-14
MIR600HG	CTTN	protein_coding	-0.525	2.92791e-14
MIR600HG	SLK	protein_coding	-0.524	3.1054e-14
MIR600HG	BCL2L1	protein_coding	-0.524	3.22418e-14
MIR600HG	CD2AP	protein_coding	-0.524	3.25266e-14
MIR600HG	GABBR1	protein_coding	0.524	3.26814e-14
MIR600HG	IL1RN	protein_coding	-0.523	3.44539e-14
MIR600HG	FGD6	protein_coding	-0.523	3.45967e-14
MIR600HG	VPS35	protein_coding	-0.523	3.46611e-14
MIR600HG	IGF2BP2	protein_coding	-0.523	3.54421e-14
MIR600HG	KATNAL2	protein_coding	0.523	3.69788e-14
MIR600HG	RHOXF1	protein_coding	0.523	3.71019e-14
MIR600HG	MORC4	protein_coding	-0.523	3.74334e-14
MIR600HG	RGL4	protein_coding	0.523	3.81402e-14
MIR600HG	TMEM51	protein_coding	-0.523	3.85279e-14
MIR600HG	SMAGP	protein_coding	-0.522	3.89011e-14
MIR600HG	INCA1	protein_coding	0.522	3.90612e-14
MIR600HG	LCN10	protein_coding	0.522	4.34499e-14
MIR600HG	POMT1	protein_coding	0.522	4.36094e-14
MIR600HG	TRIP10	protein_coding	-0.522	4.40536e-14
MIR600HG	CD9	protein_coding	-0.521	4.51399e-14
MIR600HG	MMP14	protein_coding	-0.521	4.57786e-14
MIR600HG	CHP1	protein_coding	-0.521	4.64701e-14
MIR600HG	FNDC3B	protein_coding	-0.521	4.71389e-14
MIR600HG	SQOR	protein_coding	-0.521	4.76972e-14
MIR600HG	GCNA	protein_coding	0.521	4.82364e-14
MIR600HG	AJUBA	protein_coding	-0.521	4.92478e-14
MIR600HG	DSG2	protein_coding	-0.521	4.96147e-14
MIR600HG	C1orf198	protein_coding	-0.521	4.96336e-14
MIR600HG	TSC1	protein_coding	0.521	4.97955e-14
MIR600HG	P2RY2	protein_coding	-0.52	5.03813e-14
MIR600HG	EPX	protein_coding	0.52	5.22777e-14
MIR600HG	MROH8	protein_coding	0.52	5.23338e-14
MIR600HG	TBC1D13	protein_coding	0.52	5.27827e-14
MIR600HG	SPRED1	protein_coding	-0.52	5.39318e-14
MIR600HG	ARHGAP18	protein_coding	-0.52	5.43985e-14
MIR600HG	GPLD1	protein_coding	0.52	5.50061e-14
MIR600HG	C3orf52	protein_coding	-0.52	5.63952e-14
MIR600HG	ACOT9	protein_coding	-0.519	5.73242e-14
MIR600HG	DOK4	protein_coding	-0.519	5.80774e-14
MIR600HG	RIPK2	protein_coding	-0.519	6.26801e-14
MIR600HG	ANKRD22	protein_coding	-0.519	6.42361e-14
MIR600HG	GULP1	protein_coding	-0.518	6.73946e-14
MIR600HG	ALOX12	protein_coding	0.518	6.78424e-14
MIR600HG	SLC25A43	protein_coding	-0.518	6.96238e-14
MIR600HG	BEND5	protein_coding	0.518	6.99392e-14
MIR600HG	AC011511.1	protein_coding	0.518	7.01816e-14
MIR600HG	TNKS1BP1	protein_coding	-0.518	7.08503e-14
MIR600HG	SLC6A16	protein_coding	0.518	7.17185e-14
MIR600HG	DEPDC5	protein_coding	0.518	7.19698e-14
MIR600HG	LRCOL1	protein_coding	0.518	7.20597e-14
MIR600HG	RAB6A	protein_coding	-0.518	7.24149e-14
MIR600HG	CHRM5	protein_coding	0.518	7.33185e-14
MIR600HG	OCIAD2	protein_coding	-0.518	7.37767e-14
MIR600HG	SYTL4	protein_coding	-0.517	7.54755e-14
MIR600HG	PGS1	protein_coding	0.517	7.59988e-14
MIR600HG	CGN	protein_coding	-0.517	7.67458e-14
MIR600HG	HDGF	protein_coding	-0.517	7.72975e-14
MIR600HG	RAB38	protein_coding	-0.517	8.07626e-14
MIR600HG	TMEM175	protein_coding	0.517	8.1012e-14
MIR600HG	BBIP1	protein_coding	0.517	8.11286e-14
MIR600HG	EIF2S1	protein_coding	-0.517	8.13387e-14
MIR600HG	RASGRP2	protein_coding	0.517	8.14401e-14
MIR600HG	CHMP3	protein_coding	-0.517	8.34086e-14
MIR600HG	FAM153C	protein_coding	0.517	8.34326e-14
MIR600HG	SHANK3	protein_coding	0.516	8.44082e-14
MIR600HG	POU2F3	protein_coding	-0.516	8.56769e-14
MIR600HG	TTC34	protein_coding	0.516	8.76691e-14
MIR600HG	XRCC5	protein_coding	-0.516	9.05342e-14
MIR600HG	MYEOV	protein_coding	-0.516	9.08883e-14
MIR600HG	ARHGAP21	protein_coding	-0.516	9.39914e-14
MIR600HG	ZNF10	protein_coding	0.516	9.47185e-14
MIR600HG	FGF17	protein_coding	0.516	9.54071e-14
MIR600HG	TSPAN6	protein_coding	-0.515	9.8474e-14
MIR600HG	HNRNPH1	protein_coding	0.515	9.92342e-14
MIR600HG	DNASE1L3	protein_coding	0.515	9.98413e-14
MIR600HG	ZDHHC3	protein_coding	-0.515	1.02098e-13
MIR600HG	ERGIC1	protein_coding	-0.515	1.0267e-13
MIR600HG	ARCN1	protein_coding	-0.515	1.03785e-13
MIR600HG	YES1	protein_coding	-0.515	1.05987e-13
MIR600HG	NFE2L3	protein_coding	-0.515	1.06129e-13
MIR600HG	CNTRL	protein_coding	0.514	1.10421e-13
MIR600HG	EFNA4	protein_coding	-0.514	1.11348e-13
MIR600HG	PRELID2	protein_coding	-0.514	1.14583e-13
MIR600HG	HTATIP2	protein_coding	-0.514	1.15108e-13
MIR600HG	ARIH2OS	protein_coding	0.514	1.15463e-13
MIR600HG	LRP10	protein_coding	-0.514	1.2048e-13
MIR600HG	TMEM86B	protein_coding	0.514	1.2105e-13
MIR600HG	ABHD4	protein_coding	-0.513	1.25189e-13
MIR600HG	CTBP2	protein_coding	-0.513	1.26458e-13
MIR600HG	JPT1	protein_coding	-0.513	1.26704e-13
MIR600HG	SLC6A14	protein_coding	-0.513	1.28096e-13
MIR600HG	PPP1R16B	protein_coding	0.513	1.2953e-13
MIR600HG	SRSF5	protein_coding	0.513	1.30843e-13
MIR600HG	TACSTD2	protein_coding	-0.513	1.32194e-13
MIR600HG	PPM1K	protein_coding	0.513	1.37975e-13
MIR600HG	CYB5B	protein_coding	-0.512	1.40638e-13
MIR600HG	ZNF335	protein_coding	0.512	1.43255e-13
MIR600HG	RRAS	protein_coding	-0.512	1.5117e-13
MIR600HG	PKD1P1	protein_coding	0.512	1.55774e-13
MIR600HG	RHPN2	protein_coding	-0.512	1.58023e-13
MIR600HG	WBP1	protein_coding	0.512	1.58114e-13
MIR600HG	DCTPP1	protein_coding	-0.511	1.61132e-13
MIR600HG	P4HA1	protein_coding	-0.511	1.62379e-13
MIR600HG	PPP6R2	protein_coding	0.511	1.62543e-13
MIR600HG	KDM5B	protein_coding	-0.511	1.65221e-13
MIR600HG	NECTIN4	protein_coding	-0.511	1.66108e-13
MIR600HG	MAPK11	protein_coding	0.511	1.72936e-13
MIR600HG	GSTP1	protein_coding	-0.511	1.78675e-13
MIR600HG	OSTC	protein_coding	-0.511	1.802e-13
MIR600HG	INSIG2	protein_coding	-0.51	1.82149e-13
MIR600HG	SFI1	protein_coding	0.51	1.82307e-13
MIR600HG	NRL	protein_coding	0.51	1.87466e-13
MIR600HG	MYL12A	protein_coding	-0.51	1.88317e-13
MIR600HG	ZZEF1	protein_coding	0.51	1.90593e-13
MIR600HG	MCU	protein_coding	-0.51	1.9077e-13
MIR600HG	NRBF2	protein_coding	-0.51	1.9181e-13
MIR600HG	LRP2BP	protein_coding	0.51	1.98532e-13
MIR600HG	FAM160A1	protein_coding	-0.51	1.99109e-13
MIR600HG	CTNNB1	protein_coding	-0.51	2.00642e-13
MIR600HG	MVP	protein_coding	-0.509	2.07481e-13
MIR600HG	UPF3A	protein_coding	0.509	2.10253e-13
MIR600HG	NAA50	protein_coding	-0.509	2.105e-13
MIR600HG	NEK2	protein_coding	-0.509	2.12494e-13
MIR600HG	FUT2	protein_coding	-0.509	2.13796e-13
MIR600HG	CYB5R2	protein_coding	-0.509	2.14601e-13
MIR600HG	RAB7A	protein_coding	-0.509	2.18158e-13
MIR600HG	CUBN	protein_coding	0.509	2.18298e-13
MIR600HG	MPZL2	protein_coding	-0.509	2.19668e-13
MIR600HG	DPY19L1	protein_coding	-0.509	2.209e-13
MIR600HG	DMTF1	protein_coding	0.509	2.2659e-13
MIR600HG	CAPN3	protein_coding	0.509	2.27064e-13
MIR600HG	RARS	protein_coding	-0.509	2.28326e-13
MIR600HG	RTP5	protein_coding	0.509	2.29709e-13
MIR600HG	CHMP4C	protein_coding	-0.509	2.32644e-13
MIR600HG	B3GAT1	protein_coding	0.508	2.3516e-13
MIR600HG	CRHBP	protein_coding	0.508	2.40432e-13
MIR600HG	CTSB	protein_coding	-0.508	2.43661e-13
MIR600HG	C2orf66	protein_coding	0.508	2.44447e-13
MIR600HG	KRT72	protein_coding	0.508	2.55345e-13
MIR600HG	NRF1	protein_coding	0.508	2.58235e-13
MIR600HG	GPX8	protein_coding	-0.508	2.61648e-13
MIR600HG	BAG3	protein_coding	-0.507	2.68986e-13
MIR600HG	PIGL	protein_coding	0.507	2.72962e-13
MIR600HG	GDF7	protein_coding	0.507	2.73267e-13
MIR600HG	PRR15	protein_coding	-0.507	2.74187e-13
MIR600HG	RAPGEF6	protein_coding	0.507	2.80533e-13
MIR600HG	DOCK5	protein_coding	-0.507	2.83316e-13
MIR600HG	KRT7	protein_coding	-0.507	2.84906e-13
MIR600HG	ANXA5	protein_coding	-0.507	2.86054e-13
MIR600HG	CAPRIN1	protein_coding	-0.507	2.90273e-13
MIR600HG	RHOC	protein_coding	-0.507	2.94968e-13
MIR600HG	GJB4	protein_coding	-0.507	2.96828e-13
MIR600HG	SHISA8	protein_coding	0.507	2.97126e-13
MIR600HG	RHBDL2	protein_coding	-0.506	3.13476e-13
MIR600HG	PERP	protein_coding	-0.506	3.24097e-13
MIR600HG	ABHD17C	protein_coding	-0.506	3.29078e-13
MIR600HG	TAGLN2	protein_coding	-0.506	3.30969e-13
MIR600HG	WNT2	protein_coding	-0.506	3.31256e-13
MIR600HG	MXD4	protein_coding	0.506	3.32968e-13
MIR600HG	ERO1A	protein_coding	-0.506	3.34599e-13
MIR600HG	PARP4	protein_coding	-0.506	3.35056e-13
MIR600HG	TDRD10	protein_coding	0.505	3.38685e-13
MIR600HG	COPG1	protein_coding	-0.505	3.42092e-13
MIR600HG	RNF166	protein_coding	0.505	3.52025e-13
MIR600HG	NOXRED1	protein_coding	0.505	3.60433e-13
MIR600HG	SLC35A2	protein_coding	-0.505	3.76898e-13
MIR600HG	C19orf33	protein_coding	-0.505	3.78251e-13
MIR600HG	MDM4	protein_coding	0.505	3.8177e-13
MIR600HG	CDH3	protein_coding	-0.504	4.00731e-13
MIR600HG	ZC3H15	protein_coding	-0.504	4.0458e-13
MIR600HG	PITX1	protein_coding	-0.504	4.09467e-13
MIR600HG	SFXN5	protein_coding	0.504	4.13092e-13
MIR600HG	XYLB	protein_coding	-0.504	4.14362e-13
MIR600HG	BZW2	protein_coding	-0.504	4.17658e-13
MIR600HG	RASA4	protein_coding	0.504	4.20965e-13
MIR600HG	TLDC1	protein_coding	-0.504	4.21027e-13
MIR600HG	ELOVL1	protein_coding	-0.504	4.24048e-13
MIR600HG	EPHB4	protein_coding	-0.504	4.2414e-13
MIR600HG	SLC35F5	protein_coding	-0.503	4.34663e-13
MIR600HG	LEMD1	protein_coding	-0.503	4.49505e-13
MIR600HG	CBFA2T3	protein_coding	0.503	4.67028e-13
MIR600HG	FA2H	protein_coding	-0.503	4.6829e-13
MIR600HG	TXN	protein_coding	-0.503	4.72766e-13
MIR600HG	DHX32	protein_coding	-0.503	4.74622e-13
MIR600HG	CAPN5	protein_coding	-0.503	4.76285e-13
MIR600HG	GNA15	protein_coding	-0.503	4.77211e-13
MIR600HG	S100A6	protein_coding	-0.503	4.81479e-13
MIR600HG	NCKAP1	protein_coding	-0.503	4.84898e-13
MIR600HG	F11R	protein_coding	-0.503	4.86278e-13
MIR600HG	KLHL22	protein_coding	0.502	5.01707e-13
MIR600HG	CEACAM6	protein_coding	-0.502	5.1075e-13
MIR600HG	KPNA4	protein_coding	-0.502	5.43279e-13
MIR600HG	FBXO10	protein_coding	0.502	5.50934e-13
MIR600HG	PDGFC	protein_coding	-0.502	5.51279e-13
MIR600HG	GALNT10	protein_coding	-0.501	5.77661e-13
MIR600HG	FOXF2	protein_coding	-0.501	5.77666e-13
MIR600HG	WDR88	protein_coding	0.501	5.81777e-13
MIR600HG	ZG16B	protein_coding	-0.501	5.85871e-13
MIR600HG	MCMBP	protein_coding	-0.501	5.87378e-13
MIR600HG	TNFRSF21	protein_coding	-0.501	5.91115e-13
MIR600HG	CD160	protein_coding	0.501	5.99442e-13
MIR600HG	PLA2G6	protein_coding	0.501	6.10103e-13
MIR600HG	THBS2	protein_coding	-0.5	6.30019e-13
MIR600HG	MAL2	protein_coding	-0.5	6.32803e-13
MIR600HG	SPECC1	protein_coding	-0.5	6.39802e-13
MIR600HG	EID2B	protein_coding	0.5	6.54336e-13
MIR600HG	MDFI	protein_coding	-0.5	6.64557e-13
MIR600HG	HNRNPF	protein_coding	-0.5	6.73469e-13
MIR600HG	PDCD10	protein_coding	-0.5	6.89885e-13
MIR600HG	ECM1	protein_coding	-0.5	7.02319e-13
MIR600HG	AC119396.1	protein_coding	0.5	7.03549e-13
MIR600HG	AC022400.6	protein_coding	0.5	7.03804e-13
MIR600HG	BTBD10	protein_coding	-0.499	7.08174e-13
MIR600HG	BRICD5	protein_coding	0.499	7.17835e-13
MIR600HG	TRIM66	protein_coding	0.499	7.28965e-13
MIR600HG	CATSPER1	protein_coding	-0.499	7.32045e-13
MIR600HG	B3GNT3	protein_coding	-0.499	7.33695e-13
MIR600HG	IL1RAP	protein_coding	-0.499	7.36877e-13
MIR600HG	ANXA11	protein_coding	-0.499	7.39313e-13
MIR600HG	P2RX5	protein_coding	0.499	7.39985e-13
MIR600HG	PHACTR1	protein_coding	0.499	7.51288e-13
MIR600HG	ERGIC2	protein_coding	-0.499	7.90174e-13
MIR600HG	GNG12	protein_coding	-0.498	8.09272e-13
MIR600HG	ZNF493	protein_coding	0.498	8.15846e-13
MIR600HG	TES	protein_coding	-0.498	8.19552e-13
MIR600HG	PTMA	protein_coding	-0.498	8.21009e-13
MIR600HG	ZNF439	protein_coding	0.498	8.56314e-13
MIR600HG	ADAM10	protein_coding	-0.498	8.60533e-13
MIR600HG	PDZD4	protein_coding	0.498	8.75285e-13
MIR600HG	MTMR3	protein_coding	0.498	8.80147e-13
MIR600HG	SFTA2	protein_coding	-0.498	8.81016e-13
MIR600HG	MYL12B	protein_coding	-0.498	8.8166e-13
MIR600HG	DIRC2	protein_coding	-0.498	8.9215e-13
MIR600HG	PPP1R3B	protein_coding	-0.498	8.94147e-13
MIR600HG	LPCAT2	protein_coding	-0.497	9.16366e-13
MIR600HG	TLR3	protein_coding	-0.497	9.19735e-13
MIR600HG	COL11A1	protein_coding	-0.497	9.35535e-13
MIR600HG	SOWAHC	protein_coding	-0.497	9.40857e-13
MIR600HG	SLC12A1	protein_coding	0.497	9.48039e-13
MIR600HG	GALNT7	protein_coding	-0.497	9.49353e-13
MIR600HG	ARIH2	protein_coding	0.497	9.73929e-13
MIR600HG	ATP2C1	protein_coding	-0.497	9.76718e-13
MIR600HG	STT3A	protein_coding	-0.497	1.00546e-12
MIR600HG	ZNF789	protein_coding	0.496	1.0412e-12
MIR600HG	TMEM159	protein_coding	-0.496	1.06426e-12
MIR600HG	GALE	protein_coding	-0.496	1.07248e-12
MIR600HG	GVQW3	protein_coding	0.496	1.07628e-12
MIR600HG	FAM163A	protein_coding	0.496	1.07734e-12
MIR600HG	ARG1	protein_coding	0.496	1.0886e-12
MIR600HG	PARVA	protein_coding	-0.496	1.09701e-12
MIR600HG	ACSL5	protein_coding	-0.496	1.11089e-12
MIR600HG	GPC4	protein_coding	-0.496	1.13844e-12
MIR600HG	CCER2	protein_coding	0.495	1.15366e-12
MIR600HG	RPN1	protein_coding	-0.495	1.17154e-12
MIR600HG	PTK6	protein_coding	-0.495	1.20147e-12
MIR600HG	AL353588.1	protein_coding	0.495	1.21159e-12
MIR600HG	OCM	protein_coding	0.495	1.22752e-12
MIR600HG	SCAI	protein_coding	0.495	1.23708e-12
MIR600HG	LTB4R2	protein_coding	0.495	1.24042e-12
MIR600HG	SH2D3C	protein_coding	0.495	1.28372e-12
MIR600HG	PLPP4	protein_coding	-0.494	1.30443e-12
MIR600HG	ZDHHC7	protein_coding	-0.494	1.32006e-12
MIR600HG	NRG2	protein_coding	0.494	1.32498e-12
MIR600HG	TLCD2	protein_coding	-0.494	1.34105e-12
MIR600HG	SF1	protein_coding	0.494	1.36358e-12
MIR600HG	TSPAN7	protein_coding	0.494	1.38503e-12
MIR600HG	CKS1B	protein_coding	-0.494	1.38687e-12
MIR600HG	SFXN3	protein_coding	-0.494	1.39547e-12
MIR600HG	SH3BP4	protein_coding	-0.494	1.41763e-12
MIR600HG	MMP7	protein_coding	-0.494	1.42028e-12
MIR600HG	CTHRC1	protein_coding	-0.494	1.42489e-12
MIR600HG	MTMR2	protein_coding	-0.494	1.43264e-12
MIR600HG	KPNA7	protein_coding	-0.493	1.47185e-12
MIR600HG	ARVCF	protein_coding	0.493	1.48011e-12
MIR600HG	LONRF3	protein_coding	-0.493	1.48887e-12
MIR600HG	MZF1	protein_coding	0.493	1.48996e-12
MIR600HG	STX16-NPEPL1	protein_coding	0.493	1.49938e-12
MIR600HG	GTF2IRD2	protein_coding	0.493	1.50831e-12
MIR600HG	GCNT3	protein_coding	-0.493	1.51905e-12
MIR600HG	SPRN	protein_coding	0.493	1.52788e-12
MIR600HG	SLC12A8	protein_coding	-0.493	1.55127e-12
MIR600HG	CLDN1	protein_coding	-0.493	1.55463e-12
MIR600HG	TEAD3	protein_coding	-0.493	1.55975e-12
MIR600HG	BAK1	protein_coding	-0.493	1.59565e-12
MIR600HG	CCL20	protein_coding	-0.493	1.61406e-12
MIR600HG	TMEM123	protein_coding	-0.493	1.61844e-12
MIR600HG	LTB4R	protein_coding	0.493	1.62405e-12
MIR600HG	PLOD1	protein_coding	-0.492	1.68676e-12
MIR600HG	ADAMTS12	protein_coding	-0.492	1.69806e-12
MIR600HG	SERPINH1	protein_coding	-0.492	1.73163e-12
MIR600HG	PGM2	protein_coding	-0.492	1.75931e-12
MIR600HG	B3GNT2	protein_coding	-0.492	1.8151e-12
MIR600HG	NOVA1	protein_coding	0.492	1.82147e-12
MIR600HG	NEIL1	protein_coding	0.492	1.83855e-12
MIR600HG	ZNF763	protein_coding	0.491	1.86194e-12
MIR600HG	APH1A	protein_coding	-0.491	1.88379e-12
MIR600HG	IQGAP1	protein_coding	-0.491	1.88882e-12
MIR600HG	FMN1	protein_coding	-0.491	1.89672e-12
MIR600HG	KIAA1522	protein_coding	-0.491	1.97638e-12
MIR600HG	FRMPD1	protein_coding	0.491	1.99753e-12
MIR600HG	IQGAP3	protein_coding	-0.491	2.00062e-12
MIR600HG	NOP10	protein_coding	-0.491	2.04907e-12
MIR600HG	ATP1B3	protein_coding	-0.491	2.05049e-12
MIR600HG	VCL	protein_coding	-0.491	2.06169e-12
MIR600HG	ERVMER34-1	protein_coding	-0.49	2.09973e-12
MIR600HG	TPH1	protein_coding	0.49	2.10891e-12
MIR600HG	TBC1D29	protein_coding	0.49	2.11014e-12
MIR600HG	GNAI3	protein_coding	-0.49	2.11032e-12
MIR600HG	DPP3	protein_coding	-0.49	2.15831e-12
MIR600HG	DDX17	protein_coding	0.49	2.16588e-12
MIR600HG	WNT5A	protein_coding	-0.49	2.16826e-12
MIR600HG	HEXDC	protein_coding	0.49	2.21298e-12
MIR600HG	RFXAP	protein_coding	0.49	2.21536e-12
MIR600HG	ZNF831	protein_coding	0.49	2.26867e-12
MIR600HG	CXXC1	protein_coding	0.49	2.28069e-12
MIR600HG	SCML4	protein_coding	0.49	2.28785e-12
MIR600HG	AP3S1	protein_coding	-0.49	2.32667e-12
MIR600HG	SH3D19	protein_coding	-0.49	2.33714e-12
MIR600HG	STX6	protein_coding	-0.489	2.36425e-12
MIR600HG	STN1	protein_coding	-0.489	2.40936e-12
MIR600HG	ARHGAP33	protein_coding	0.489	2.41222e-12
MIR600HG	POF1B	protein_coding	-0.489	2.42516e-12
MIR600HG	CETP	protein_coding	0.489	2.48955e-12
MIR600HG	RBM11	protein_coding	0.489	2.52814e-12
MIR600HG	ZDHHC20	protein_coding	-0.489	2.54161e-12
MIR600HG	MRPS10	protein_coding	-0.489	2.61907e-12
MIR600HG	SH3RF1	protein_coding	-0.488	2.66154e-12
MIR600HG	CDR2L	protein_coding	-0.488	2.74405e-12
MIR600HG	ZNF441	protein_coding	0.488	2.775e-12
MIR600HG	USP49	protein_coding	0.488	2.8155e-12
MIR600HG	GLRX2	protein_coding	-0.488	2.84334e-12
MIR600HG	SNTB1	protein_coding	-0.488	2.90678e-12
MIR600HG	KIAA0895L	protein_coding	0.488	2.91581e-12
MIR600HG	SERINC2	protein_coding	-0.488	2.94577e-12
MIR600HG	GSPT1	protein_coding	-0.488	2.95849e-12
MIR600HG	SECISBP2	protein_coding	0.487	3.02557e-12
MIR600HG	CBX3	protein_coding	-0.487	3.03769e-12
MIR600HG	TCEAL9	protein_coding	-0.487	3.04457e-12
MIR600HG	CD151	protein_coding	-0.487	3.07641e-12
MIR600HG	GOLGA8B	protein_coding	0.487	3.10066e-12
MIR600HG	AHNAK2	protein_coding	-0.487	3.1835e-12
MIR600HG	TGIF1	protein_coding	-0.487	3.19827e-12
MIR600HG	VEGFD	protein_coding	0.487	3.26395e-12
MIR600HG	ZNF839	protein_coding	0.487	3.29097e-12
MIR600HG	OGFOD1	protein_coding	-0.486	3.34885e-12
MIR600HG	RAB27B	protein_coding	-0.486	3.38419e-12
MIR600HG	RYK	protein_coding	-0.486	3.47582e-12
MIR600HG	EPHX4	protein_coding	-0.486	3.51415e-12
MIR600HG	HFE	protein_coding	-0.486	3.57395e-12
MIR600HG	TMEM50A	protein_coding	-0.486	3.62006e-12
MIR600HG	TMEM185B	protein_coding	-0.486	3.64372e-12
MIR600HG	NIP7	protein_coding	-0.486	3.72145e-12
MIR600HG	CKAP2L	protein_coding	-0.485	3.79698e-12
MIR600HG	EFNB2	protein_coding	-0.485	3.82642e-12
MIR600HG	TTC32	protein_coding	0.485	3.84853e-12
MIR600HG	ACACB	protein_coding	0.485	3.86559e-12
MIR600HG	ZNF438	protein_coding	-0.485	3.88618e-12
MIR600HG	PARD3	protein_coding	-0.485	4.04026e-12
MIR600HG	TMOD3	protein_coding	-0.485	4.06821e-12
MIR600HG	CENPN	protein_coding	-0.485	4.07161e-12
MIR600HG	ERVK3-1	protein_coding	0.485	4.13438e-12
MIR600HG	CASP6	protein_coding	-0.485	4.1382e-12
MIR600HG	ITPRID2	protein_coding	-0.485	4.1767e-12
MIR600HG	WDR6	protein_coding	0.485	4.18554e-12
MIR600HG	ZNF488	protein_coding	-0.484	4.21479e-12
MIR600HG	GKAP1	protein_coding	0.484	4.28547e-12
MIR600HG	UEVLD	protein_coding	-0.484	4.31542e-12
MIR600HG	ESCO2	protein_coding	-0.484	4.33951e-12
MIR600HG	GRIN2C	protein_coding	0.484	4.36427e-12
MIR600HG	ZNF775	protein_coding	0.484	4.52243e-12
MIR600HG	OTUD7A	protein_coding	0.484	4.57577e-12
MIR600HG	UGT1A6	protein_coding	-0.484	4.68012e-12
MIR600HG	MSX2	protein_coding	-0.483	4.7929e-12
MIR600HG	REPS2	protein_coding	-0.483	4.79604e-12
MIR600HG	C1orf116	protein_coding	-0.483	4.81707e-12
MIR600HG	BAIAP2L1	protein_coding	-0.483	4.86869e-12
MIR600HG	HEATR9	protein_coding	0.483	5.04207e-12
MIR600HG	CDC25C	protein_coding	-0.483	5.04286e-12
MIR600HG	TIMM17A	protein_coding	-0.483	5.15128e-12
MIR600HG	HSD17B2	protein_coding	-0.483	5.22746e-12
MIR600HG	METAP1	protein_coding	-0.483	5.2292e-12
MIR600HG	SIK3	protein_coding	0.483	5.29021e-12
MIR600HG	SESN1	protein_coding	0.482	5.3077e-12
MIR600HG	MGAT4B	protein_coding	-0.482	5.45102e-12
MIR600HG	MAGT1	protein_coding	-0.482	5.54167e-12
MIR600HG	ZNF778	protein_coding	0.482	5.58897e-12
MIR600HG	LIMS1	protein_coding	-0.482	5.60401e-12
MIR600HG	DPH7	protein_coding	0.482	5.75825e-12
MIR600HG	IGSF9	protein_coding	-0.482	5.76327e-12
MIR600HG	ERLIN1	protein_coding	-0.482	5.85016e-12
MIR600HG	BLZF1	protein_coding	-0.482	5.86039e-12
MIR600HG	MGST1	protein_coding	-0.481	5.99162e-12
MIR600HG	IRAK4	protein_coding	0.481	6.00267e-12
MIR600HG	CDK1	protein_coding	-0.481	6.00473e-12
MIR600HG	HSF5	protein_coding	0.481	6.01584e-12
MIR600HG	LMBR1L	protein_coding	0.481	6.02454e-12
MIR600HG	IARS2	protein_coding	-0.481	6.07622e-12
MIR600HG	COL10A1	protein_coding	-0.481	6.21064e-12
MIR600HG	ZNF333	protein_coding	0.481	6.22868e-12
MIR600HG	PKP4	protein_coding	-0.481	6.2752e-12
MIR600HG	ADIPOR1	protein_coding	-0.481	6.30038e-12
MIR600HG	AC023509.3	protein_coding	0.481	6.3202e-12
MIR600HG	INHBA	protein_coding	-0.481	6.49252e-12
MIR600HG	SOX4	protein_coding	-0.481	6.63854e-12
MIR600HG	ACVR1	protein_coding	-0.48	6.6743e-12
MIR600HG	AGR2	protein_coding	-0.48	6.72684e-12
MIR600HG	DLGAP3	protein_coding	0.48	6.79159e-12
MIR600HG	CAST	protein_coding	-0.48	6.79266e-12
MIR600HG	ACBD3	protein_coding	-0.48	6.84666e-12
MIR600HG	PRPSAP2	protein_coding	0.48	6.92079e-12
MIR600HG	EGFL7	protein_coding	0.48	6.97165e-12
MIR600HG	GBP2	protein_coding	-0.48	7.04248e-12
MIR600HG	RUFY3	protein_coding	0.48	7.04599e-12
MIR600HG	DLGAP5	protein_coding	-0.48	7.18229e-12
MIR600HG	LRG1	protein_coding	-0.48	7.39657e-12
MIR600HG	DTL	protein_coding	-0.48	7.40631e-12
MIR600HG	DIO2	protein_coding	-0.479	7.61018e-12
MIR600HG	PROM1	protein_coding	-0.479	7.67987e-12
MIR600HG	ZNF157	protein_coding	0.479	7.79676e-12
MIR600HG	KARS	protein_coding	-0.479	7.83911e-12
MIR600HG	FGFR1OP	protein_coding	0.479	7.84684e-12
MIR600HG	RNF7	protein_coding	-0.479	7.98503e-12
MIR600HG	JMJD7-PLA2G4B	protein_coding	0.479	7.99619e-12
MIR600HG	STAMBP	protein_coding	-0.479	8.04533e-12
MIR600HG	CSTF2	protein_coding	-0.479	8.32523e-12
MIR600HG	FAM129B	protein_coding	-0.478	8.68504e-12
MIR600HG	NMU	protein_coding	-0.478	8.82757e-12
MIR600HG	NLN	protein_coding	-0.478	8.96449e-12
MIR600HG	SLC25A53	protein_coding	0.478	9.03459e-12
MIR600HG	MRPS22	protein_coding	-0.478	9.16873e-12
MIR600HG	PSMD1	protein_coding	-0.478	9.20683e-12
MIR600HG	C14orf119	protein_coding	-0.478	9.26838e-12
MIR600HG	LRRC37B	protein_coding	0.477	9.40802e-12
MIR600HG	ZNF84	protein_coding	0.477	9.45909e-12
MIR600HG	EPM2AIP1	protein_coding	0.477	9.51614e-12
MIR600HG	ANKRD44	protein_coding	0.477	9.63169e-12
MIR600HG	LUC7L	protein_coding	0.477	9.68998e-12
MIR600HG	TAS2R4	protein_coding	0.477	9.75015e-12
MIR600HG	RNF223	protein_coding	-0.477	9.83888e-12
MIR600HG	ZNF101	protein_coding	0.477	9.8488e-12
MIR600HG	CXCL16	protein_coding	-0.477	9.87136e-12
MIR600HG	UGP2	protein_coding	-0.477	1.00428e-11
MIR600HG	TMEM178B	protein_coding	0.477	1.01228e-11
MIR600HG	PPARG	protein_coding	-0.477	1.01336e-11
MIR600HG	CENPF	protein_coding	-0.477	1.02168e-11
MIR600HG	GALK2	protein_coding	-0.477	1.02407e-11
MIR600HG	DGKE	protein_coding	0.477	1.04075e-11
MIR600HG	POU6F1	protein_coding	0.477	1.041e-11
MIR600HG	KCNK12	protein_coding	0.476	1.05091e-11
MIR600HG	SYPL1	protein_coding	-0.476	1.05857e-11
MIR600HG	CDK7	protein_coding	-0.476	1.06093e-11
MIR600HG	ZNF682	protein_coding	0.476	1.06637e-11
MIR600HG	C8orf44	protein_coding	0.476	1.08351e-11
MIR600HG	ALDH3B1	protein_coding	-0.476	1.09023e-11
MIR600HG	SLC5A10	protein_coding	0.476	1.10582e-11
MIR600HG	ZNF559	protein_coding	0.476	1.12553e-11
MIR600HG	TNFRSF10A	protein_coding	-0.476	1.12566e-11
MIR600HG	WNT10B	protein_coding	0.476	1.13079e-11
MIR600HG	EPN3	protein_coding	-0.476	1.13428e-11
MIR600HG	CYP2S1	protein_coding	-0.476	1.13895e-11
MIR600HG	AL121845.3	protein_coding	0.476	1.15793e-11
MIR600HG	VPS37C	protein_coding	-0.476	1.17335e-11
MIR600HG	PSMD7	protein_coding	-0.475	1.18544e-11
MIR600HG	CDC42EP1	protein_coding	-0.475	1.18739e-11
MIR600HG	AVEN	protein_coding	-0.475	1.20435e-11
MIR600HG	B4GALT5	protein_coding	-0.475	1.21387e-11
MIR600HG	TNR	protein_coding	0.475	1.22852e-11
MIR600HG	FCRL1	protein_coding	0.475	1.23506e-11
MIR600HG	LRRC4B	protein_coding	0.475	1.2401e-11
MIR600HG	KLRK1	protein_coding	0.475	1.25064e-11
MIR600HG	KHDRBS2	protein_coding	0.475	1.27605e-11
MIR600HG	TAS2R20	protein_coding	0.475	1.28414e-11
MIR600HG	DTX3L	protein_coding	-0.474	1.34736e-11
MIR600HG	TIMM23	protein_coding	-0.474	1.36536e-11
MIR600HG	LDLR	protein_coding	-0.474	1.37341e-11
MIR600HG	LY6E	protein_coding	-0.474	1.38101e-11
MIR600HG	SNX12	protein_coding	-0.474	1.40268e-11
MIR600HG	ZAP70	protein_coding	0.474	1.42721e-11
MIR600HG	C11orf24	protein_coding	-0.474	1.43341e-11
MIR600HG	PDE6C	protein_coding	0.474	1.43798e-11
MIR600HG	FBLIM1	protein_coding	-0.474	1.44282e-11
MIR600HG	ADGRF1	protein_coding	-0.474	1.44462e-11
MIR600HG	GLUD1	protein_coding	-0.474	1.4467e-11
MIR600HG	CHST8	protein_coding	0.473	1.48676e-11
MIR600HG	XDH	protein_coding	-0.473	1.49087e-11
MIR600HG	ZNF740	protein_coding	0.473	1.49986e-11
MIR600HG	ENC1	protein_coding	-0.473	1.50034e-11
MIR600HG	PRDX1	protein_coding	-0.473	1.5087e-11
MIR600HG	EXO1	protein_coding	-0.473	1.51621e-11
MIR600HG	LSM12	protein_coding	-0.473	1.51666e-11
MIR600HG	EXPH5	protein_coding	-0.473	1.51734e-11
MIR600HG	ITGAV	protein_coding	-0.473	1.52504e-11
MIR600HG	PARD6B	protein_coding	-0.473	1.52757e-11
MIR600HG	ARPC2	protein_coding	-0.473	1.53476e-11
MIR600HG	CDK6	protein_coding	-0.473	1.53846e-11
MIR600HG	NCBP3	protein_coding	0.473	1.53992e-11
MIR600HG	WNT1	protein_coding	0.473	1.54882e-11
MIR600HG	REEP3	protein_coding	-0.473	1.55437e-11
MIR600HG	IRF6	protein_coding	-0.473	1.55775e-11
MIR600HG	TLR10	protein_coding	0.473	1.57229e-11
MIR600HG	DDX18	protein_coding	-0.473	1.58304e-11
MIR600HG	SUCLG2	protein_coding	-0.473	1.5898e-11
MIR600HG	PICALM	protein_coding	-0.473	1.59719e-11
MIR600HG	CCDC43	protein_coding	-0.473	1.60406e-11
MIR600HG	CFAP70	protein_coding	0.473	1.6213e-11
MIR600HG	AKR1C3	protein_coding	-0.472	1.64987e-11
MIR600HG	CAV2	protein_coding	-0.472	1.65547e-11
MIR600HG	LUC7L3	protein_coding	0.472	1.7088e-11
MIR600HG	TRIM15	protein_coding	-0.472	1.73272e-11
MIR600HG	CACNA1I	protein_coding	0.472	1.74989e-11
MIR600HG	SORD	protein_coding	-0.472	1.75299e-11
MIR600HG	C5orf46	protein_coding	-0.472	1.77089e-11
MIR600HG	ZNF554	protein_coding	0.472	1.78239e-11
MIR600HG	NGEF	protein_coding	-0.472	1.78671e-11
MIR600HG	RASL10A	protein_coding	0.472	1.79567e-11
MIR600HG	TMEM41A	protein_coding	-0.472	1.7993e-11
MIR600HG	FAM229A	protein_coding	0.472	1.80537e-11
MIR600HG	CAB39	protein_coding	-0.472	1.83284e-11
MIR600HG	ERBB3	protein_coding	-0.471	1.84141e-11
MIR600HG	PBK	protein_coding	-0.471	1.86457e-11
MIR600HG	MECP2	protein_coding	0.471	1.87349e-11
MIR600HG	MRPL15	protein_coding	-0.471	1.88616e-11
MIR600HG	UGGT2	protein_coding	-0.471	1.89761e-11
MIR600HG	FKBP9	protein_coding	-0.471	1.89844e-11
MIR600HG	ST14	protein_coding	-0.471	1.90344e-11
MIR600HG	CHRNA10	protein_coding	0.471	1.90611e-11
MIR600HG	ZW10	protein_coding	-0.471	1.9116e-11
MIR600HG	UACA	protein_coding	-0.471	1.92193e-11
MIR600HG	RUNX1	protein_coding	-0.471	1.95429e-11
MIR600HG	PAX5	protein_coding	0.471	1.97991e-11
MIR600HG	PPP4R1	protein_coding	-0.471	1.98753e-11
MIR600HG	KLHL14	protein_coding	0.471	2.02668e-11
MIR600HG	PATL1	protein_coding	-0.471	2.04728e-11
MIR600HG	TBC1D10C	protein_coding	0.471	2.05528e-11
MIR600HG	FOXL1	protein_coding	-0.47	2.0555e-11
MIR600HG	SCN4A	protein_coding	0.47	2.06345e-11
MIR600HG	SLC10A3	protein_coding	-0.47	2.06765e-11
MIR600HG	VANGL1	protein_coding	-0.47	2.08442e-11
MIR600HG	HNRNPA1L2	protein_coding	0.47	2.09145e-11
MIR600HG	CASK	protein_coding	-0.47	2.12885e-11
MIR600HG	BLK	protein_coding	0.47	2.13103e-11
MIR600HG	ITGA3	protein_coding	-0.47	2.14189e-11
MIR600HG	PDIA4	protein_coding	-0.47	2.15177e-11
MIR600HG	TOP2A	protein_coding	-0.47	2.15393e-11
MIR600HG	GOLGA8N	protein_coding	0.47	2.16078e-11
MIR600HG	MELK	protein_coding	-0.47	2.16504e-11
MIR600HG	GSKIP	protein_coding	-0.47	2.18742e-11
MIR600HG	DAD1	protein_coding	-0.47	2.21137e-11
MIR600HG	BACE2	protein_coding	-0.47	2.23469e-11
MIR600HG	CEMIP	protein_coding	-0.47	2.27904e-11
MIR600HG	ETFA	protein_coding	-0.469	2.30288e-11
MIR600HG	SERTM2	protein_coding	0.469	2.30761e-11
MIR600HG	TEPSIN	protein_coding	0.469	2.34808e-11
MIR600HG	APOBEC1	protein_coding	-0.469	2.35459e-11
MIR600HG	AHR	protein_coding	-0.469	2.36878e-11
MIR600HG	PPWD1	protein_coding	0.469	2.37753e-11
MIR600HG	SLC6A13	protein_coding	0.469	2.41116e-11
MIR600HG	SHB	protein_coding	-0.469	2.44115e-11
MIR600HG	SH2D3A	protein_coding	-0.469	2.46289e-11
MIR600HG	KDELC2	protein_coding	-0.469	2.4701e-11
MIR600HG	UBTD2	protein_coding	-0.469	2.47091e-11
MIR600HG	SUMO3	protein_coding	-0.469	2.50527e-11
MIR600HG	PDPN	protein_coding	-0.469	2.51083e-11
MIR600HG	FAM214A	protein_coding	0.469	2.54838e-11
MIR600HG	PRDM15	protein_coding	0.468	2.72571e-11
MIR600HG	NDST2	protein_coding	0.468	2.73398e-11
MIR600HG	ASPDH	protein_coding	0.468	2.7973e-11
MIR600HG	SNPH	protein_coding	0.468	2.81787e-11
MIR600HG	QSOX2	protein_coding	0.468	2.8194e-11
MIR600HG	PALB2	protein_coding	-0.468	2.82523e-11
MIR600HG	TEAD4	protein_coding	-0.468	2.82525e-11
MIR600HG	TTC16	protein_coding	0.467	2.86812e-11
MIR600HG	SERPINB8	protein_coding	-0.467	2.91287e-11
MIR600HG	CCND1	protein_coding	-0.467	2.9132e-11
MIR600HG	SHC1	protein_coding	-0.467	2.95911e-11
MIR600HG	TRIM16	protein_coding	-0.467	2.96864e-11
MIR600HG	RAP2B	protein_coding	-0.467	2.98546e-11
MIR600HG	ZNF75A	protein_coding	0.467	3.00717e-11
MIR600HG	OAS1	protein_coding	-0.467	3.03871e-11
MIR600HG	TSPAN15	protein_coding	-0.467	3.05523e-11
MIR600HG	ZNF318	protein_coding	0.467	3.06769e-11
MIR600HG	TM9SF3	protein_coding	-0.467	3.06977e-11
MIR600HG	AC006254.1	protein_coding	0.467	3.12923e-11
MIR600HG	SRC	protein_coding	-0.467	3.14809e-11
MIR600HG	HHIP	protein_coding	-0.467	3.15478e-11
MIR600HG	SNAP91	protein_coding	0.467	3.17533e-11
MIR600HG	RAB25	protein_coding	-0.466	3.20998e-11
MIR600HG	TTC23L	protein_coding	0.466	3.21913e-11
MIR600HG	STK39	protein_coding	-0.466	3.22392e-11
MIR600HG	KCNIP2	protein_coding	0.466	3.24533e-11
MIR600HG	NT5M	protein_coding	0.466	3.30248e-11
MIR600HG	TCAP	protein_coding	0.466	3.32414e-11
MIR600HG	CTTNBP2NL	protein_coding	-0.466	3.39944e-11
MIR600HG	FAM186A	protein_coding	0.466	3.41326e-11
MIR600HG	MICU1	protein_coding	-0.466	3.42256e-11
MIR600HG	LRRC37A3	protein_coding	0.466	3.46128e-11
MIR600HG	DYNC1I2	protein_coding	-0.466	3.48967e-11
MIR600HG	LOXL2	protein_coding	-0.466	3.52161e-11
MIR600HG	DCBLD1	protein_coding	-0.465	3.6308e-11
MIR600HG	NCEH1	protein_coding	-0.465	3.66016e-11
MIR600HG	BMP4	protein_coding	-0.465	3.6834e-11
MIR600HG	NDFIP2	protein_coding	-0.465	3.76068e-11
MIR600HG	FAM193B	protein_coding	0.465	3.79096e-11
MIR600HG	NDUFA4	protein_coding	-0.465	3.83281e-11
MIR600HG	TSSK3	protein_coding	0.465	3.87625e-11
MIR600HG	USP6	protein_coding	0.465	3.88023e-11
MIR600HG	EPB41L1	protein_coding	-0.465	3.89976e-11
MIR600HG	HJURP	protein_coding	-0.465	3.90786e-11
MIR600HG	RHBDF1	protein_coding	-0.464	3.97377e-11
MIR600HG	PATL2	protein_coding	0.464	3.98332e-11
MIR600HG	SLC35E2A	protein_coding	0.464	3.99588e-11
MIR600HG	RAB5A	protein_coding	-0.464	4.09205e-11
MIR600HG	SLC35E2B	protein_coding	0.464	4.10751e-11
MIR600HG	TRPV1	protein_coding	0.464	4.1677e-11
MIR600HG	KCTD19	protein_coding	0.464	4.25594e-11
MIR600HG	UBQLN4	protein_coding	-0.463	4.42774e-11
MIR600HG	SLC23A2	protein_coding	0.463	4.44935e-11
MIR600HG	BTNL9	protein_coding	0.463	4.47304e-11
MIR600HG	LRRC39	protein_coding	0.463	4.49272e-11
MIR600HG	ABCC3	protein_coding	-0.463	4.50417e-11
MIR600HG	ZNF891	protein_coding	0.463	4.52467e-11
MIR600HG	PTPN14	protein_coding	-0.463	4.53404e-11
MIR600HG	UBE2E3	protein_coding	-0.463	4.56218e-11
MIR600HG	SSH2	protein_coding	0.463	4.5652e-11
MIR600HG	AFF3	protein_coding	0.463	4.64093e-11
MIR600HG	MTERF2	protein_coding	0.463	4.66114e-11
MIR600HG	FAM83D	protein_coding	-0.463	4.73873e-11
MIR600HG	MKI67	protein_coding	-0.463	4.83392e-11
MIR600HG	ETV4	protein_coding	-0.463	4.85283e-11
MIR600HG	SIN3B	protein_coding	0.463	4.88689e-11
MIR600HG	SRPK1	protein_coding	-0.463	4.8892e-11
MIR600HG	TLE2	protein_coding	0.462	4.97341e-11
MIR600HG	CDC42EP2	protein_coding	-0.462	5.01618e-11
MIR600HG	MACC1	protein_coding	-0.462	5.03675e-11
MIR600HG	NDNF	protein_coding	-0.462	5.0446e-11
MIR600HG	LYRM9	protein_coding	0.462	5.08273e-11
MIR600HG	PRR11	protein_coding	-0.462	5.09418e-11
MIR600HG	SNAPC4	protein_coding	0.462	5.17623e-11
MIR600HG	TRAF1	protein_coding	0.462	5.19282e-11
MIR600HG	KPNA5	protein_coding	0.462	5.23151e-11
MIR600HG	FRMD6	protein_coding	-0.462	5.29591e-11
MIR600HG	TENT4A	protein_coding	0.462	5.32375e-11
MIR600HG	PLEKHB2	protein_coding	-0.462	5.33613e-11
MIR600HG	UPB1	protein_coding	0.462	5.37652e-11
MIR600HG	TPX2	protein_coding	-0.462	5.4429e-11
MIR600HG	KRT80	protein_coding	-0.462	5.45381e-11
MIR600HG	AK4	protein_coding	-0.461	5.49998e-11
MIR600HG	FBXL16	protein_coding	0.461	5.50165e-11
MIR600HG	CARD6	protein_coding	-0.461	5.52109e-11
MIR600HG	MSANTD1	protein_coding	0.461	5.60062e-11
MIR600HG	TMEM127	protein_coding	-0.461	5.60307e-11
MIR600HG	GPRASP1	protein_coding	0.461	5.63188e-11
MIR600HG	CCM2L	protein_coding	0.461	5.6618e-11
MIR600HG	FCRL2	protein_coding	0.461	5.74597e-11
MIR600HG	KDSR	protein_coding	-0.461	5.77999e-11
MIR600HG	PSMD14	protein_coding	-0.461	5.93105e-11
MIR600HG	AGR3	protein_coding	-0.461	5.93279e-11
MIR600HG	CPA5	protein_coding	0.461	6.02606e-11
MIR600HG	IRAK2	protein_coding	-0.46	6.1721e-11
MIR600HG	COL12A1	protein_coding	-0.46	6.23142e-11
MIR600HG	SUMO1	protein_coding	-0.46	6.27285e-11
MIR600HG	TMED8	protein_coding	0.46	6.31687e-11
MIR600HG	MEF2B	protein_coding	0.46	6.38241e-11
MIR600HG	MICAL1	protein_coding	0.46	6.38658e-11
MIR600HG	PLCB3	protein_coding	-0.46	6.41076e-11
MIR600HG	TYK2	protein_coding	0.46	6.41205e-11
MIR600HG	WASL	protein_coding	-0.46	6.42531e-11
MIR600HG	TJP2	protein_coding	-0.46	6.44933e-11
MIR600HG	TREM1	protein_coding	-0.46	6.53515e-11
MIR600HG	ZNF497	protein_coding	0.46	6.64046e-11
MIR600HG	LCN6	protein_coding	0.46	6.67362e-11
MIR600HG	BCL2L15	protein_coding	-0.46	6.74688e-11
MIR600HG	KIF23	protein_coding	-0.46	6.77566e-11
MIR600HG	MCM10	protein_coding	-0.459	6.84723e-11
MIR600HG	MOSPD1	protein_coding	-0.459	6.86005e-11
MIR600HG	COPB2	protein_coding	-0.459	6.94906e-11
MIR600HG	DRICH1	protein_coding	0.459	7.10088e-11
MIR600HG	ZGLP1	protein_coding	0.459	7.20313e-11
MIR600HG	RSU1	protein_coding	-0.459	7.2283e-11
MIR600HG	C16orf96	protein_coding	0.459	7.24573e-11
MIR600HG	DNAH1	protein_coding	0.459	7.28766e-11
MIR600HG	RHOD	protein_coding	-0.459	7.3406e-11
MIR600HG	NAP1L2	protein_coding	0.459	7.40206e-11
MIR600HG	PPP5D1	protein_coding	0.459	7.55549e-11
MIR600HG	MANBA	protein_coding	-0.458	7.5787e-11
MIR600HG	SSTR2	protein_coding	0.458	7.59085e-11
MIR600HG	C7orf43	protein_coding	0.458	7.62505e-11
MIR600HG	ARHGAP32	protein_coding	-0.458	7.64192e-11
MIR600HG	TUBA8	protein_coding	0.458	7.64655e-11
MIR600HG	MYT1	protein_coding	0.458	7.66199e-11
MIR600HG	AC244197.3	protein_coding	0.458	7.72508e-11
MIR600HG	FRRS1	protein_coding	-0.458	7.74562e-11
MIR600HG	MFAP2	protein_coding	-0.458	7.76457e-11
MIR600HG	SPAG8	protein_coding	0.458	7.82584e-11
MIR600HG	KCMF1	protein_coding	-0.458	7.95221e-11
MIR600HG	RYR3	protein_coding	0.458	7.95978e-11
MIR600HG	PAQR4	protein_coding	-0.458	7.98789e-11
MIR600HG	GDF9	protein_coding	0.458	8.05637e-11
MIR600HG	GNPNAT1	protein_coding	-0.458	8.1059e-11
MIR600HG	MAPK8IP3	protein_coding	0.458	8.12177e-11
MIR600HG	EREG	protein_coding	-0.458	8.165e-11
MIR600HG	ZNF185	protein_coding	-0.458	8.20531e-11
MIR600HG	COL19A1	protein_coding	0.458	8.24669e-11
MIR600HG	FZD5	protein_coding	-0.458	8.25805e-11
MIR600HG	HS3ST1	protein_coding	-0.458	8.25994e-11
MIR600HG	TMEM80	protein_coding	0.458	8.3016e-11
MIR600HG	TMEM139	protein_coding	-0.458	8.32818e-11
MIR600HG	MTHFD1L	protein_coding	-0.458	8.37891e-11
MIR600HG	CCNB2	protein_coding	-0.457	8.42799e-11
MIR600HG	WDFY2	protein_coding	0.457	8.5072e-11
MIR600HG	KLHL36	protein_coding	0.457	8.68799e-11
MIR600HG	FAM71F2	protein_coding	0.457	8.7131e-11
MIR600HG	NMI	protein_coding	-0.457	8.83704e-11
MIR600HG	PPP2R3B	protein_coding	0.457	8.93369e-11
MIR600HG	WDFY1	protein_coding	-0.457	8.95541e-11
MIR600HG	KIF14	protein_coding	-0.457	9.00933e-11
MIR600HG	JAG1	protein_coding	-0.457	9.05231e-11
MIR600HG	IPO7	protein_coding	-0.456	9.36648e-11
MIR600HG	CAP1	protein_coding	-0.456	9.45525e-11
MIR600HG	UBE2C	protein_coding	-0.456	9.64007e-11
MIR600HG	CACNB2	protein_coding	0.456	9.6744e-11
MIR600HG	SMAP2	protein_coding	0.456	9.76535e-11
MIR600HG	UGT1A10	protein_coding	-0.456	9.79498e-11
MIR600HG	ZNF781	protein_coding	0.456	9.84236e-11
MIR600HG	CNR2	protein_coding	0.456	9.9356e-11
MIR600HG	PAQR5	protein_coding	-0.456	1.00222e-10
MIR600HG	CDK5R1	protein_coding	0.456	1.01182e-10
MIR600HG	MS4A1	protein_coding	0.456	1.01187e-10
MIR600HG	CORO2A	protein_coding	-0.456	1.01354e-10
MIR600HG	VSIG2	protein_coding	-0.456	1.01472e-10
MIR600HG	MYO1D	protein_coding	-0.456	1.01585e-10
MIR600HG	AZIN1	protein_coding	-0.456	1.0211e-10
MIR600HG	YIPF5	protein_coding	-0.456	1.03877e-10
MIR600HG	ACTR3	protein_coding	-0.455	1.04099e-10
MIR600HG	MMP3	protein_coding	-0.455	1.0413e-10
MIR600HG	GLRX3	protein_coding	-0.455	1.04941e-10
MIR600HG	ZNF182	protein_coding	0.455	1.0514e-10
MIR600HG	GDE1	protein_coding	-0.455	1.05485e-10
MIR600HG	KDM8	protein_coding	0.455	1.05814e-10
MIR600HG	KRT16	protein_coding	-0.455	1.08959e-10
MIR600HG	ELMO1	protein_coding	0.455	1.09657e-10
MIR600HG	ANGEL1	protein_coding	0.455	1.09736e-10
MIR600HG	NAA40	protein_coding	0.455	1.10648e-10
MIR600HG	EZR	protein_coding	-0.455	1.11938e-10
MIR600HG	RETSAT	protein_coding	-0.455	1.12461e-10
MIR600HG	RHOV	protein_coding	-0.455	1.12623e-10
MIR600HG	C4orf50	protein_coding	0.455	1.12897e-10
MIR600HG	ZNF181	protein_coding	0.455	1.13224e-10
MIR600HG	TMEM30B	protein_coding	-0.455	1.14352e-10
MIR600HG	FAM177A1	protein_coding	-0.455	1.15109e-10
MIR600HG	ZNF302	protein_coding	0.454	1.17075e-10
MIR600HG	GPR39	protein_coding	-0.454	1.1837e-10
MIR600HG	CARF	protein_coding	0.454	1.18859e-10
MIR600HG	FADS3	protein_coding	0.454	1.19337e-10
MIR600HG	SLC25A24	protein_coding	-0.454	1.19916e-10
MIR600HG	HSPD1	protein_coding	-0.454	1.19932e-10
MIR600HG	FGFRL1	protein_coding	-0.454	1.20341e-10
MIR600HG	TAX1BP3	protein_coding	-0.454	1.20362e-10
MIR600HG	STPG3	protein_coding	0.454	1.20467e-10
MIR600HG	DGCR8	protein_coding	0.454	1.20571e-10
MIR600HG	PAFAH1B2	protein_coding	-0.454	1.22408e-10
MIR600HG	GNG2	protein_coding	0.454	1.25052e-10
MIR600HG	PRKCI	protein_coding	-0.454	1.25491e-10
MIR600HG	CYP2C18	protein_coding	-0.454	1.26849e-10
MIR600HG	SLC7A11	protein_coding	-0.454	1.27215e-10
MIR600HG	PAXBP1	protein_coding	0.454	1.27321e-10
MIR600HG	PRPF39	protein_coding	0.453	1.29408e-10
MIR600HG	ALDH18A1	protein_coding	-0.453	1.29741e-10
MIR600HG	KANK3	protein_coding	0.453	1.301e-10
MIR600HG	CXorf57	protein_coding	0.453	1.32697e-10
MIR600HG	NICN1	protein_coding	0.453	1.35317e-10
MIR600HG	SEPT2	protein_coding	-0.453	1.37016e-10
MIR600HG	TNNT1	protein_coding	-0.453	1.38381e-10
MIR600HG	IL32	protein_coding	-0.453	1.38493e-10
MIR600HG	SPATA25	protein_coding	0.453	1.38603e-10
MIR600HG	SLC9B1	protein_coding	0.453	1.39101e-10
MIR600HG	MYEF2	protein_coding	0.453	1.39175e-10
MIR600HG	IGSF3	protein_coding	-0.453	1.40322e-10
MIR600HG	PTBP2	protein_coding	0.453	1.40744e-10
MIR600HG	COL5A2	protein_coding	-0.453	1.40879e-10
MIR600HG	LRRC8A	protein_coding	-0.452	1.44225e-10
MIR600HG	PNP	protein_coding	-0.452	1.44781e-10
MIR600HG	CD59	protein_coding	-0.452	1.44875e-10
MIR600HG	HIC2	protein_coding	0.452	1.45463e-10
MIR600HG	AQP5	protein_coding	-0.452	1.46685e-10
MIR600HG	TOGARAM2	protein_coding	0.452	1.47232e-10
MIR600HG	SDCBP	protein_coding	-0.452	1.49137e-10
MIR600HG	LAT	protein_coding	0.452	1.49454e-10
MIR600HG	MAPK6	protein_coding	-0.452	1.52249e-10
MIR600HG	TUFT1	protein_coding	-0.452	1.52534e-10
MIR600HG	RSPO4	protein_coding	0.452	1.52575e-10
MIR600HG	PPP3CA	protein_coding	-0.452	1.53598e-10
MIR600HG	E2F7	protein_coding	-0.452	1.53644e-10
MIR600HG	PRRT1	protein_coding	0.452	1.55231e-10
MIR600HG	KIF20A	protein_coding	-0.452	1.56146e-10
MIR600HG	ATP6V1G2	protein_coding	0.451	1.59173e-10
MIR600HG	EIF4E2	protein_coding	-0.451	1.59818e-10
MIR600HG	RASAL1	protein_coding	-0.451	1.60314e-10
MIR600HG	CFAP410	protein_coding	0.451	1.63564e-10
MIR600HG	CLDN23	protein_coding	-0.451	1.63986e-10
MIR600HG	DNMBP	protein_coding	-0.451	1.65539e-10
MIR600HG	YWHAH	protein_coding	-0.451	1.67139e-10
MIR600HG	KRT18	protein_coding	-0.451	1.68865e-10
MIR600HG	NFE2L2	protein_coding	-0.451	1.71246e-10
MIR600HG	ATL3	protein_coding	-0.451	1.72222e-10
MIR600HG	WNK3	protein_coding	0.451	1.73773e-10
MIR600HG	SPTBN1	protein_coding	-0.451	1.75381e-10
MIR600HG	SUGCT	protein_coding	-0.451	1.75561e-10
MIR600HG	L3MBTL1	protein_coding	0.45	1.75904e-10
MIR600HG	KRAS	protein_coding	-0.45	1.77117e-10
MIR600HG	HSD17B3	protein_coding	0.45	1.77707e-10
MIR600HG	LACTB2	protein_coding	-0.45	1.78228e-10
MIR600HG	INTS6L	protein_coding	0.45	1.78355e-10
MIR600HG	AGBL3	protein_coding	0.45	1.7854e-10
MIR600HG	PRELID3B	protein_coding	-0.45	1.78756e-10
MIR600HG	JOSD1	protein_coding	-0.45	1.80037e-10
MIR600HG	CTDSPL	protein_coding	-0.45	1.8025e-10
MIR600HG	IL15RA	protein_coding	-0.45	1.82289e-10
MIR600HG	DAG1	protein_coding	-0.45	1.82383e-10
MIR600HG	SLC30A1	protein_coding	-0.45	1.825e-10
MIR600HG	LAMC1	protein_coding	-0.45	1.84116e-10
MIR600HG	ATIC	protein_coding	-0.45	1.84161e-10
MIR600HG	RPRML	protein_coding	0.45	1.85519e-10
MIR600HG	PISD	protein_coding	0.45	1.86635e-10
MIR600HG	FAM111B	protein_coding	-0.45	1.86733e-10
MIR600HG	DLEU7	protein_coding	-0.45	1.86743e-10
MIR600HG	DDX51	protein_coding	0.45	1.87952e-10
MIR600HG	PCLAF	protein_coding	-0.45	1.90063e-10
MIR600HG	BRI3	protein_coding	-0.45	1.92026e-10
MIR600HG	BLVRB	protein_coding	-0.45	1.9344e-10
MIR600HG	VAMP3	protein_coding	-0.449	1.9551e-10
MIR600HG	MAGEE1	protein_coding	0.449	1.96999e-10
MIR600HG	ABLIM3	protein_coding	-0.449	1.97148e-10
MIR600HG	LGALS3BP	protein_coding	-0.449	1.99475e-10
MIR600HG	ZNF491	protein_coding	0.449	2.00743e-10
MIR600HG	ALDH7A1	protein_coding	-0.449	2.04017e-10
MIR600HG	PYGB	protein_coding	-0.449	2.05434e-10
MIR600HG	ARSG	protein_coding	0.449	2.06096e-10
MIR600HG	PARN	protein_coding	-0.449	2.07841e-10
MIR600HG	GALM	protein_coding	-0.449	2.08034e-10
MIR600HG	SKA3	protein_coding	-0.449	2.0826e-10
MIR600HG	KCNN4	protein_coding	-0.449	2.08991e-10
MIR600HG	KDM2B	protein_coding	0.449	2.09128e-10
MIR600HG	PPP2CB	protein_coding	-0.449	2.09293e-10
MIR600HG	HTRA3	protein_coding	-0.449	2.10399e-10
MIR600HG	TAC4	protein_coding	0.449	2.10611e-10
MIR600HG	ALG8	protein_coding	-0.449	2.11913e-10
MIR600HG	BAG4	protein_coding	-0.449	2.12088e-10
MIR600HG	PGK1	protein_coding	-0.449	2.12627e-10
MIR600HG	CASKIN2	protein_coding	0.449	2.13515e-10
MIR600HG	DUSP10	protein_coding	-0.449	2.15663e-10
MIR600HG	PI3	protein_coding	-0.448	2.16856e-10
MIR600HG	IFFO1	protein_coding	0.448	2.17002e-10
MIR600HG	DNAJC27	protein_coding	0.448	2.1739e-10
MIR600HG	HAP1	protein_coding	0.448	2.18012e-10
MIR600HG	IDE	protein_coding	-0.448	2.2261e-10
MIR600HG	TRAF3	protein_coding	0.448	2.24456e-10
MIR600HG	FOSL1	protein_coding	-0.448	2.24537e-10
MIR600HG	AREG	protein_coding	-0.448	2.26203e-10
MIR600HG	ZBTB37	protein_coding	0.448	2.2685e-10
MIR600HG	SLC4A8	protein_coding	0.448	2.27906e-10
MIR600HG	TSPAN8	protein_coding	-0.448	2.28251e-10
MIR600HG	TSPAN33	protein_coding	0.448	2.30009e-10
MIR600HG	OAS3	protein_coding	-0.448	2.31426e-10
MIR600HG	AC008770.2	protein_coding	0.448	2.31475e-10
MIR600HG	SYT2	protein_coding	0.448	2.32153e-10
MIR600HG	SSB	protein_coding	-0.448	2.33304e-10
MIR600HG	RBM33	protein_coding	0.448	2.35158e-10
MIR600HG	RBM7	protein_coding	-0.448	2.35574e-10
MIR600HG	RELL2	protein_coding	0.448	2.36738e-10
MIR600HG	CLDN4	protein_coding	-0.448	2.36832e-10
MIR600HG	SEMA3C	protein_coding	-0.448	2.39478e-10
MIR600HG	TMEM43	protein_coding	-0.447	2.39757e-10
MIR600HG	CKLF	protein_coding	-0.447	2.3981e-10
MIR600HG	BCL2L14	protein_coding	-0.447	2.42799e-10
MIR600HG	QRICH2	protein_coding	0.447	2.45513e-10
MIR600HG	TSPEAR	protein_coding	0.447	2.46625e-10
MIR600HG	SLC39A11	protein_coding	-0.447	2.48349e-10
MIR600HG	PRSS23	protein_coding	-0.447	2.4944e-10
MIR600HG	AC008878.3	protein_coding	0.447	2.51347e-10
MIR600HG	CDC6	protein_coding	-0.447	2.52091e-10
MIR600HG	GNB3	protein_coding	0.447	2.52245e-10
MIR600HG	ZCWPW1	protein_coding	0.447	2.54274e-10
MIR600HG	SLAIN2	protein_coding	-0.447	2.57432e-10
MIR600HG	MAP3K14	protein_coding	0.447	2.58299e-10
MIR600HG	TMTC2	protein_coding	-0.447	2.60267e-10
MIR600HG	ZNF582	protein_coding	0.447	2.64608e-10
MIR600HG	SMOX	protein_coding	-0.447	2.64949e-10
MIR600HG	HEPH	protein_coding	-0.446	2.66514e-10
MIR600HG	GIMAP5	protein_coding	0.446	2.68186e-10
MIR600HG	ADSS	protein_coding	-0.446	2.74689e-10
MIR600HG	BCAS1	protein_coding	-0.446	2.77134e-10
MIR600HG	NKTR	protein_coding	0.446	2.78589e-10
MIR600HG	UNC13A	protein_coding	0.446	2.78866e-10
MIR600HG	EGFL8	protein_coding	0.446	2.82638e-10
MIR600HG	USHBP1	protein_coding	0.446	2.84813e-10
MIR600HG	ASPM	protein_coding	-0.446	2.87386e-10
MIR600HG	UNC119	protein_coding	0.446	2.8813e-10
MIR600HG	FKBP10	protein_coding	-0.446	2.88398e-10
MIR600HG	UBE2G2	protein_coding	0.446	2.89763e-10
MIR600HG	STRN	protein_coding	-0.446	2.91945e-10
MIR600HG	ZWILCH	protein_coding	-0.445	2.97029e-10
MIR600HG	IL4	protein_coding	0.445	2.97601e-10
MIR600HG	MTDH	protein_coding	-0.445	2.97868e-10
MIR600HG	CDK3	protein_coding	0.445	3.00401e-10
MIR600HG	ASAP2	protein_coding	-0.445	3.04227e-10
MIR600HG	ZFP14	protein_coding	0.445	3.15589e-10
MIR600HG	STYK1	protein_coding	-0.445	3.16804e-10
MIR600HG	MRPL53	protein_coding	0.445	3.20897e-10
MIR600HG	METTL9	protein_coding	-0.445	3.21918e-10
MIR600HG	OLA1	protein_coding	-0.445	3.23439e-10
MIR600HG	CRYBG2	protein_coding	-0.444	3.25755e-10
MIR600HG	CAPZA2	protein_coding	-0.444	3.27411e-10
MIR600HG	ZMPSTE24	protein_coding	-0.444	3.27418e-10
MIR600HG	ACSL3	protein_coding	-0.444	3.28672e-10
MIR600HG	TSG101	protein_coding	-0.444	3.2881e-10
MIR600HG	TXK	protein_coding	0.444	3.31089e-10
MIR600HG	TNRC6C	protein_coding	0.444	3.32398e-10
MIR600HG	PKP3	protein_coding	-0.444	3.3272e-10
MIR600HG	PRRT3	protein_coding	0.444	3.35542e-10
MIR600HG	CDCA2	protein_coding	-0.444	3.39806e-10
MIR600HG	BRF1	protein_coding	0.444	3.4219e-10
MIR600HG	MGLL	protein_coding	-0.444	3.42224e-10
MIR600HG	KRBOX4	protein_coding	0.444	3.4391e-10
MIR600HG	SYNRG	protein_coding	0.444	3.47309e-10
MIR600HG	SDC1	protein_coding	-0.444	3.48014e-10
MIR600HG	RRM2	protein_coding	-0.444	3.50149e-10
MIR600HG	COMMD2	protein_coding	-0.444	3.50601e-10
MIR600HG	ZNF529	protein_coding	0.444	3.51293e-10
MIR600HG	WDR97	protein_coding	0.444	3.51826e-10
MIR600HG	DDX39B	protein_coding	0.444	3.53417e-10
MIR600HG	NUSAP1	protein_coding	-0.444	3.57018e-10
MIR600HG	UHRF1	protein_coding	-0.444	3.58041e-10
MIR600HG	CD300LG	protein_coding	0.443	3.64558e-10
MIR600HG	LCN2	protein_coding	-0.443	3.66216e-10
MIR600HG	TCF12	protein_coding	-0.443	3.66511e-10
MIR600HG	REST	protein_coding	-0.443	3.70188e-10
MIR600HG	SEPT11	protein_coding	-0.443	3.7052e-10
MIR600HG	PRC1	protein_coding	-0.443	3.73515e-10
MIR600HG	COL1A2	protein_coding	-0.443	3.736e-10
MIR600HG	ICA1L	protein_coding	0.443	3.7545e-10
MIR600HG	LRRC7	protein_coding	0.443	3.75933e-10
MIR600HG	DOCK3	protein_coding	0.443	3.76902e-10
MIR600HG	RACGAP1	protein_coding	-0.443	3.78631e-10
MIR600HG	CERS2	protein_coding	-0.443	3.79054e-10
MIR600HG	MSLN	protein_coding	-0.443	3.80813e-10
MIR600HG	SULF1	protein_coding	-0.443	3.8089e-10
MIR600HG	ARL14	protein_coding	-0.443	3.81009e-10
MIR600HG	ADGRF4	protein_coding	-0.443	3.82791e-10
MIR600HG	PHETA2	protein_coding	-0.443	3.83267e-10
MIR600HG	ENO1	protein_coding	-0.443	3.83415e-10
MIR600HG	HSPE1	protein_coding	-0.443	3.84318e-10
MIR600HG	TMA16	protein_coding	-0.443	3.89432e-10
MIR600HG	ARF6	protein_coding	-0.443	3.90324e-10
MIR600HG	EIF3J	protein_coding	-0.443	3.93615e-10
MIR600HG	PPP2R2A	protein_coding	-0.443	3.94468e-10
MIR600HG	TMSB10	protein_coding	-0.443	3.95891e-10
MIR600HG	TMPRSS3	protein_coding	-0.443	3.96457e-10
MIR600HG	MAU2	protein_coding	0.442	4.05795e-10
MIR600HG	CATSPERE	protein_coding	0.442	4.09098e-10
MIR600HG	FAM83A	protein_coding	-0.442	4.10248e-10
MIR600HG	RPP25	protein_coding	-0.442	4.12121e-10
MIR600HG	IL22RA1	protein_coding	-0.442	4.13065e-10
MIR600HG	CD79B	protein_coding	0.442	4.18444e-10
MIR600HG	OSBPL3	protein_coding	-0.442	4.18854e-10
MIR600HG	PRPF40A	protein_coding	-0.442	4.20925e-10
MIR600HG	AVPI1	protein_coding	-0.442	4.21985e-10
MIR600HG	KRT8	protein_coding	-0.442	4.24376e-10
MIR600HG	SOX9	protein_coding	-0.442	4.31882e-10
MIR600HG	FN1	protein_coding	-0.442	4.33395e-10
MIR600HG	CHKB-CPT1B	protein_coding	0.442	4.34087e-10
MIR600HG	TNFRSF10B	protein_coding	-0.442	4.36844e-10
MIR600HG	RAB9A	protein_coding	-0.441	4.42622e-10
MIR600HG	REXO2	protein_coding	-0.441	4.44733e-10
MIR600HG	PPFIBP1	protein_coding	-0.441	4.45619e-10
MIR600HG	GSTO1	protein_coding	-0.441	4.4562e-10
MIR600HG	EARS2	protein_coding	-0.441	4.4594e-10
MIR600HG	PKM	protein_coding	-0.441	4.46132e-10
MIR600HG	EIF2A	protein_coding	-0.441	4.48118e-10
MIR600HG	TIAF1	protein_coding	0.441	4.51173e-10
MIR600HG	PLA2R1	protein_coding	-0.441	4.52694e-10
MIR600HG	MISP	protein_coding	-0.441	4.54958e-10
MIR600HG	GGCX	protein_coding	-0.441	4.55365e-10
MIR600HG	C14orf180	protein_coding	0.441	4.56868e-10
MIR600HG	SOCS2	protein_coding	0.441	4.60492e-10
MIR600HG	NDE1	protein_coding	-0.441	4.62625e-10
MIR600HG	RAB13	protein_coding	-0.441	4.66215e-10
MIR600HG	2018-03-05	protein_coding	-0.441	4.67245e-10
MIR600HG	ADAMTSL5	protein_coding	-0.441	4.69941e-10
MIR600HG	PSORS1C1	protein_coding	-0.441	4.78148e-10
MIR600HG	ERI2	protein_coding	-0.441	4.78571e-10
MIR600HG	ZNF580	protein_coding	0.441	4.79841e-10
MIR600HG	GABRG3	protein_coding	0.441	4.81986e-10
MIR600HG	PTPRR	protein_coding	-0.441	4.82297e-10
MIR600HG	NTM	protein_coding	-0.441	4.83035e-10
MIR600HG	COL8A1	protein_coding	-0.441	4.83995e-10
MIR600HG	FTCD	protein_coding	0.441	4.84113e-10
MIR600HG	ADGRG6	protein_coding	-0.44	4.88673e-10
MIR600HG	VASP	protein_coding	-0.44	4.95163e-10
MIR600HG	S100A3	protein_coding	-0.44	5.0164e-10
MIR600HG	PDZD11	protein_coding	-0.44	5.06343e-10
MIR600HG	CC2D2B	protein_coding	0.44	5.10686e-10
MIR600HG	MIPOL1	protein_coding	-0.44	5.11805e-10
MIR600HG	EPM2A	protein_coding	0.44	5.13876e-10
MIR600HG	MARVELD1	protein_coding	-0.44	5.1415e-10
MIR600HG	DDX60	protein_coding	-0.44	5.14403e-10
MIR600HG	GALNT6	protein_coding	-0.44	5.17713e-10
MIR600HG	TOX	protein_coding	0.44	5.2182e-10
MIR600HG	HMBOX1	protein_coding	0.44	5.22692e-10
MIR600HG	NFASC	protein_coding	0.44	5.23865e-10
MIR600HG	BZW1	protein_coding	-0.44	5.32932e-10
MIR600HG	PKD1	protein_coding	0.44	5.33673e-10
MIR600HG	NIFK	protein_coding	-0.44	5.33919e-10
MIR600HG	RBBP8	protein_coding	-0.439	5.40604e-10
MIR600HG	ARMC2	protein_coding	0.439	5.43589e-10
MIR600HG	BRINP2	protein_coding	0.439	5.53143e-10
MIR600HG	FUT4	protein_coding	-0.439	5.53986e-10
MIR600HG	ZNF547	protein_coding	0.439	5.55843e-10
MIR600HG	MMP28	protein_coding	-0.439	5.56782e-10
MIR600HG	TRIM73	protein_coding	0.439	5.5692e-10
MIR600HG	ADORA2B	protein_coding	-0.439	5.57114e-10
MIR600HG	SRSF6	protein_coding	0.439	5.5816e-10
MIR600HG	PGM1	protein_coding	-0.439	5.69569e-10
MIR600HG	ARGLU1	protein_coding	0.439	5.70807e-10
MIR600HG	VPREB3	protein_coding	0.439	5.74356e-10
MIR600HG	FCER2	protein_coding	0.439	5.76833e-10
MIR600HG	FAM209A	protein_coding	0.439	5.77642e-10
MIR600HG	TTLL3	protein_coding	0.439	5.8426e-10
MIR600HG	PRDM11	protein_coding	0.439	5.84712e-10
MIR600HG	SLC20A2	protein_coding	-0.439	5.87666e-10
MIR600HG	SEMA4D	protein_coding	0.439	5.91706e-10
MIR600HG	TFPI	protein_coding	-0.439	5.94732e-10
MIR600HG	RNASEH1	protein_coding	-0.439	5.9621e-10
MIR600HG	EPS8L1	protein_coding	-0.438	5.97102e-10
MIR600HG	TRMU	protein_coding	0.438	5.97529e-10
MIR600HG	GARNL3	protein_coding	0.438	6.01843e-10
MIR600HG	BEX2	protein_coding	0.438	6.02432e-10
MIR600HG	FLNB	protein_coding	-0.438	6.09233e-10
MIR600HG	SKOR1	protein_coding	0.438	6.13227e-10
MIR600HG	CLDN18	protein_coding	-0.438	6.15682e-10
MIR600HG	IDH1	protein_coding	-0.438	6.20037e-10
MIR600HG	C6orf223	protein_coding	-0.438	6.21921e-10
MIR600HG	FEM1A	protein_coding	0.438	6.24101e-10
MIR600HG	ELOVL6	protein_coding	-0.438	6.24661e-10
MIR600HG	ATP1A3	protein_coding	0.438	6.31226e-10
MIR600HG	AP1S3	protein_coding	-0.438	6.34594e-10
MIR600HG	ATP1B2	protein_coding	0.438	6.38693e-10
MIR600HG	BUB1	protein_coding	-0.438	6.39561e-10
MIR600HG	FLRT3	protein_coding	-0.438	6.45515e-10
MIR600HG	KIF18A	protein_coding	-0.438	6.57511e-10
MIR600HG	TUBE1	protein_coding	0.437	6.59467e-10
MIR600HG	FAM216A	protein_coding	0.437	6.60005e-10
MIR600HG	PDIA3	protein_coding	-0.437	6.63124e-10
MIR600HG	ZNF18	protein_coding	0.437	6.63612e-10
MIR600HG	SEC31A	protein_coding	-0.437	6.65329e-10
MIR600HG	TMED2	protein_coding	-0.437	6.69207e-10
MIR600HG	MAP4K4	protein_coding	-0.437	6.70096e-10
MIR600HG	FZD2	protein_coding	-0.437	6.75114e-10
MIR600HG	LFNG	protein_coding	-0.437	6.78257e-10
MIR600HG	TRPV4	protein_coding	-0.437	6.86097e-10
MIR600HG	TBCC	protein_coding	0.437	6.98539e-10
MIR600HG	STAT5B	protein_coding	0.437	7.03087e-10
MIR600HG	KCNH3	protein_coding	0.437	7.0603e-10
MIR600HG	SLC25A34	protein_coding	0.437	7.15451e-10
MIR600HG	PDIA6	protein_coding	-0.437	7.18652e-10
MIR600HG	ESRP2	protein_coding	-0.437	7.20508e-10
MIR600HG	NBPF11	protein_coding	0.437	7.21037e-10
MIR600HG	SPATA12	protein_coding	-0.437	7.25934e-10
MIR600HG	HIST1H2BD	protein_coding	-0.437	7.27087e-10
MIR600HG	SLC30A6	protein_coding	-0.436	7.28235e-10
MIR600HG	PRDX6	protein_coding	-0.436	7.29541e-10
MIR600HG	ITPRIPL2	protein_coding	-0.436	7.33959e-10
MIR600HG	ZBTB26	protein_coding	0.436	7.34321e-10
MIR600HG	MICAL2	protein_coding	-0.436	7.43009e-10
MIR600HG	TOM1L2	protein_coding	0.436	7.48035e-10
MIR600HG	STAT4	protein_coding	0.436	7.49098e-10
MIR600HG	KIF4A	protein_coding	-0.436	7.49234e-10
MIR600HG	RMDN3	protein_coding	-0.436	7.50817e-10
MIR600HG	TUBB1	protein_coding	0.436	7.50944e-10
MIR600HG	ZFP2	protein_coding	0.436	7.55793e-10
MIR600HG	PHLDA2	protein_coding	-0.436	7.56964e-10
MIR600HG	CD276	protein_coding	-0.436	7.58078e-10
MIR600HG	FXYD3	protein_coding	-0.436	7.58888e-10
MIR600HG	SNRNP70	protein_coding	0.436	7.65217e-10
MIR600HG	ABHD5	protein_coding	-0.436	7.74222e-10
MIR600HG	OVOL1	protein_coding	-0.436	7.77486e-10
MIR600HG	TK1	protein_coding	-0.436	7.77509e-10
MIR600HG	OTUD7B	protein_coding	-0.436	7.7962e-10
MIR600HG	KCTD9	protein_coding	-0.436	7.84603e-10
MIR600HG	CXCR5	protein_coding	0.436	7.92068e-10
MIR600HG	TJP3	protein_coding	-0.436	7.93425e-10
MIR600HG	DENND1C	protein_coding	0.436	7.99136e-10
MIR600HG	ARHGAP11A	protein_coding	-0.436	8.01267e-10
MIR600HG	OCLN	protein_coding	-0.435	8.07977e-10
MIR600HG	SH3TC2	protein_coding	-0.435	8.09914e-10
MIR600HG	KCNB1	protein_coding	0.435	8.10533e-10
MIR600HG	B3GNT7	protein_coding	-0.435	8.30588e-10
MIR600HG	WDR27	protein_coding	0.435	8.33239e-10
MIR600HG	TMEM105	protein_coding	-0.435	8.42286e-10
MIR600HG	TVP23A	protein_coding	0.435	8.44735e-10
MIR600HG	MELTF	protein_coding	-0.435	8.502e-10
MIR600HG	KIZ	protein_coding	0.435	8.55754e-10
MIR600HG	ALDH3A1	protein_coding	-0.435	8.56537e-10
MIR600HG	ELP1	protein_coding	0.435	8.57436e-10
MIR600HG	GMPS	protein_coding	-0.435	8.57931e-10
MIR600HG	KRTCAP3	protein_coding	-0.435	8.60831e-10
MIR600HG	CERKL	protein_coding	0.435	8.61583e-10
MIR600HG	NUAK2	protein_coding	0.435	8.6293e-10
MIR600HG	RNF39	protein_coding	-0.435	8.6582e-10
MIR600HG	SEPT10	protein_coding	-0.435	8.70597e-10
MIR600HG	DBF4B	protein_coding	0.435	8.78295e-10
MIR600HG	ARHGAP19	protein_coding	0.435	8.79139e-10
MIR600HG	RNPC3	protein_coding	0.435	8.79397e-10
MIR600HG	CLEC17A	protein_coding	0.435	8.8467e-10
MIR600HG	OLR1	protein_coding	-0.435	8.84974e-10
MIR600HG	KYNU	protein_coding	-0.435	8.85647e-10
MIR600HG	COL5A1	protein_coding	-0.434	8.92999e-10
MIR600HG	SOCS7	protein_coding	0.434	8.93364e-10
MIR600HG	PROCA1	protein_coding	0.434	8.94291e-10
MIR600HG	NAPB	protein_coding	0.434	8.97445e-10
MIR600HG	MITF	protein_coding	-0.434	8.98483e-10
MIR600HG	FBRSL1	protein_coding	0.434	8.9851e-10
MIR600HG	ZBTB48	protein_coding	0.434	9.01356e-10
MIR600HG	VEZT	protein_coding	-0.434	9.02463e-10
MIR600HG	TAF1C	protein_coding	0.434	9.1023e-10
MIR600HG	IL31RA	protein_coding	-0.434	9.12103e-10
MIR600HG	TUBB	protein_coding	-0.434	9.18223e-10
MIR600HG	CALM2	protein_coding	-0.434	9.23117e-10
MIR600HG	MKRN2OS	protein_coding	-0.434	9.3683e-10
MIR600HG	ZC3H6	protein_coding	0.434	9.39269e-10
MIR600HG	KIF26B	protein_coding	-0.434	9.41719e-10
MIR600HG	CBY3	protein_coding	0.434	9.45006e-10
MIR600HG	POLG2	protein_coding	0.434	9.6336e-10
MIR600HG	DIAPH1	protein_coding	-0.434	9.63656e-10
MIR600HG	CRAMP1	protein_coding	0.434	9.70281e-10
MIR600HG	DKK1	protein_coding	-0.434	9.76875e-10
MIR600HG	TCN1	protein_coding	-0.433	9.88203e-10
MIR600HG	ACTN4	protein_coding	-0.433	9.95283e-10
MIR600HG	KRT15	protein_coding	-0.433	9.96343e-10
MIR600HG	ANK2	protein_coding	0.433	1.01299e-09
MIR600HG	CGREF1	protein_coding	-0.433	1.03042e-09
MIR600HG	GALNT16	protein_coding	0.433	1.0312e-09
MIR600HG	PSMA5	protein_coding	-0.433	1.03349e-09
MIR600HG	MALL	protein_coding	-0.433	1.03389e-09
MIR600HG	CLK1	protein_coding	0.433	1.03561e-09
MIR600HG	YME1L1	protein_coding	-0.433	1.0361e-09
MIR600HG	TM6SF2	protein_coding	-0.433	1.03885e-09
MIR600HG	SLC9A1	protein_coding	-0.433	1.04388e-09
MIR600HG	ARHGAP42	protein_coding	-0.433	1.06065e-09
MIR600HG	PLA2G10	protein_coding	-0.433	1.0653e-09
MIR600HG	ZNF17	protein_coding	0.433	1.06993e-09
MIR600HG	SPDEF	protein_coding	-0.433	1.07109e-09
MIR600HG	CEACAM5	protein_coding	-0.432	1.09471e-09
MIR600HG	CAMK2N1	protein_coding	-0.432	1.09601e-09
MIR600HG	PAK1	protein_coding	-0.432	1.1128e-09
MIR600HG	MMP12	protein_coding	-0.432	1.12329e-09
MIR600HG	PILRB	protein_coding	0.432	1.13648e-09
MIR600HG	MRPL38	protein_coding	0.432	1.14585e-09
MIR600HG	METTL11B	protein_coding	-0.432	1.15164e-09
MIR600HG	P2RX2	protein_coding	0.432	1.15677e-09
MIR600HG	BCL10	protein_coding	-0.432	1.15743e-09
MIR600HG	ECHDC2	protein_coding	0.432	1.1638e-09
MIR600HG	CST4	protein_coding	-0.432	1.17205e-09
MIR600HG	CENPI	protein_coding	-0.432	1.18375e-09
MIR600HG	C19orf18	protein_coding	0.432	1.1866e-09
MIR600HG	NXT2	protein_coding	-0.432	1.18698e-09
MIR600HG	ERICH6B	protein_coding	0.432	1.19032e-09
MIR600HG	ULK3	protein_coding	0.431	1.19278e-09
MIR600HG	PRPS2	protein_coding	-0.431	1.19606e-09
MIR600HG	TRAM1	protein_coding	-0.431	1.19982e-09
MIR600HG	DNAJB11	protein_coding	-0.431	1.20046e-09
MIR600HG	CBFA2T2	protein_coding	0.431	1.20519e-09
MIR600HG	RAB5IF	protein_coding	-0.431	1.20738e-09
MIR600HG	GPD2	protein_coding	-0.431	1.21111e-09
MIR600HG	CDC73	protein_coding	-0.431	1.22184e-09
MIR600HG	AP3B2	protein_coding	0.431	1.22357e-09
MIR600HG	CAPN8	protein_coding	-0.431	1.24235e-09
MIR600HG	POLI	protein_coding	0.431	1.28101e-09
MIR600HG	ZPR1	protein_coding	-0.431	1.28132e-09
MIR600HG	ORAI2	protein_coding	0.431	1.28159e-09
MIR600HG	SPATA1	protein_coding	0.431	1.28797e-09
MIR600HG	DEF8	protein_coding	0.431	1.29312e-09
MIR600HG	PVRIG	protein_coding	0.431	1.29963e-09
MIR600HG	TECTA	protein_coding	0.43	1.32332e-09
MIR600HG	EIF4G1	protein_coding	-0.43	1.3274e-09
MIR600HG	PIAS2	protein_coding	0.43	1.33164e-09
MIR600HG	B4GALT2	protein_coding	-0.43	1.34556e-09
MIR600HG	ELMOD3	protein_coding	0.43	1.37625e-09
MIR600HG	TRIM67	protein_coding	0.43	1.37837e-09
MIR600HG	FUT8	protein_coding	-0.43	1.38031e-09
MIR600HG	P2RY8	protein_coding	0.43	1.39418e-09
MIR600HG	PZP	protein_coding	0.43	1.40745e-09
MIR600HG	PGM2L1	protein_coding	-0.43	1.42583e-09
MIR600HG	ERN2	protein_coding	-0.43	1.43115e-09
MIR600HG	SLAMF9	protein_coding	-0.43	1.43182e-09
MIR600HG	ATP8A1	protein_coding	0.43	1.43645e-09
MIR600HG	DNAJC28	protein_coding	0.43	1.44609e-09
MIR600HG	B4GALT1	protein_coding	-0.429	1.44784e-09
MIR600HG	IGFL2	protein_coding	-0.429	1.44943e-09
MIR600HG	MIGA2	protein_coding	0.429	1.45965e-09
MIR600HG	SLC41A2	protein_coding	-0.429	1.47047e-09
MIR600HG	MTCH2	protein_coding	-0.429	1.47491e-09
MIR600HG	COQ10B	protein_coding	-0.429	1.47732e-09
MIR600HG	AC012651.1	protein_coding	0.429	1.47948e-09
MIR600HG	EHD4	protein_coding	-0.429	1.48132e-09
MIR600HG	LGALS1	protein_coding	-0.429	1.48489e-09
MIR600HG	UGDH	protein_coding	-0.429	1.50142e-09
MIR600HG	FGFBP3	protein_coding	0.429	1.5072e-09
MIR600HG	PCDH7	protein_coding	-0.429	1.52464e-09
MIR600HG	CENPE	protein_coding	-0.429	1.54838e-09
MIR600HG	DRAM1	protein_coding	-0.429	1.5551e-09
MIR600HG	TSPO	protein_coding	-0.429	1.56529e-09
MIR600HG	AC005726.1	protein_coding	0.429	1.58027e-09
MIR600HG	PSD3	protein_coding	-0.429	1.58597e-09
MIR600HG	SPPL2B	protein_coding	0.428	1.59408e-09
MIR600HG	POLN	protein_coding	0.428	1.59636e-09
MIR600HG	AFAP1	protein_coding	-0.428	1.60275e-09
MIR600HG	CATSPER2	protein_coding	0.428	1.6214e-09
MIR600HG	SNX33	protein_coding	-0.428	1.62293e-09
MIR600HG	EVPL	protein_coding	-0.428	1.64581e-09
MIR600HG	TANC1	protein_coding	-0.428	1.6499e-09
MIR600HG	GRTP1	protein_coding	-0.428	1.65843e-09
MIR600HG	CPLX1	protein_coding	0.428	1.66025e-09
MIR600HG	PLEKHA5	protein_coding	-0.428	1.66957e-09
MIR600HG	ANKHD1-EIF4EBP3	protein_coding	0.428	1.67833e-09
MIR600HG	FAM19A2	protein_coding	0.428	1.69165e-09
MIR600HG	MYH14	protein_coding	-0.428	1.70168e-09
MIR600HG	CMTR1	protein_coding	0.428	1.71363e-09
MIR600HG	CCDC106	protein_coding	0.428	1.71498e-09
MIR600HG	HMMR	protein_coding	-0.428	1.72943e-09
MIR600HG	MRPS35	protein_coding	-0.428	1.75214e-09
MIR600HG	CASP4	protein_coding	-0.427	1.7645e-09
MIR600HG	N4BP2L2	protein_coding	0.427	1.77095e-09
MIR600HG	PQLC3	protein_coding	-0.427	1.78901e-09
MIR600HG	AGFG1	protein_coding	-0.427	1.7937e-09
MIR600HG	ZNF44	protein_coding	0.427	1.79949e-09
MIR600HG	TAPT1	protein_coding	0.427	1.83485e-09
MIR600HG	PLA2G4D	protein_coding	-0.427	1.83927e-09
MIR600HG	FBXW7	protein_coding	0.427	1.84039e-09
MIR600HG	HMGA1	protein_coding	-0.427	1.84051e-09
MIR600HG	FAM83H	protein_coding	-0.427	1.84826e-09
MIR600HG	TUT4	protein_coding	0.427	1.85686e-09
MIR600HG	DXO	protein_coding	0.427	1.85849e-09
MIR600HG	OTUD3	protein_coding	0.427	1.86009e-09
MIR600HG	CALR	protein_coding	-0.427	1.87102e-09
MIR600HG	ERI1	protein_coding	-0.427	1.88748e-09
MIR600HG	DARS2	protein_coding	-0.427	1.89047e-09
MIR600HG	NLRP4	protein_coding	0.427	1.90044e-09
MIR600HG	MYO1C	protein_coding	-0.427	1.90653e-09
MIR600HG	SH3GLB1	protein_coding	-0.427	1.92567e-09
MIR600HG	CDCA5	protein_coding	-0.426	1.95435e-09
MIR600HG	SLC50A1	protein_coding	-0.426	1.9552e-09
MIR600HG	SLC38A5	protein_coding	-0.426	1.95629e-09
MIR600HG	BACH1	protein_coding	-0.426	1.95987e-09
MIR600HG	FTSJ1	protein_coding	-0.426	1.97341e-09
MIR600HG	ATP5S	protein_coding	0.426	1.99189e-09
MIR600HG	SAP25	protein_coding	0.426	1.99796e-09
MIR600HG	FOXK1	protein_coding	0.426	2.02033e-09
MIR600HG	HSD17B11	protein_coding	-0.426	2.03427e-09
MIR600HG	ZCCHC3	protein_coding	0.426	2.06306e-09
MIR600HG	P2RX6	protein_coding	0.426	2.06901e-09
MIR600HG	VAMP8	protein_coding	-0.426	2.07374e-09
MIR600HG	C17orf100	protein_coding	0.426	2.08461e-09
MIR600HG	F3	protein_coding	-0.426	2.10522e-09
MIR600HG	NOB1	protein_coding	-0.426	2.11826e-09
MIR600HG	EMP2	protein_coding	-0.425	2.14128e-09
MIR600HG	NOX4	protein_coding	-0.425	2.15279e-09
MIR600HG	KCNK6	protein_coding	-0.425	2.18004e-09
MIR600HG	ANTXR1	protein_coding	-0.425	2.18097e-09
MIR600HG	KITLG	protein_coding	-0.425	2.21129e-09
MIR600HG	TFAP2A	protein_coding	-0.425	2.21634e-09
MIR600HG	LSR	protein_coding	-0.425	2.2399e-09
MIR600HG	ADGRG2	protein_coding	0.425	2.24706e-09
MIR600HG	RAB11FIP5	protein_coding	-0.425	2.25075e-09
MIR600HG	PMEPA1	protein_coding	-0.425	2.25137e-09
MIR600HG	FASTKD2	protein_coding	-0.425	2.25564e-09
MIR600HG	UAP1	protein_coding	-0.425	2.27632e-09
MIR600HG	TMEM88	protein_coding	0.425	2.28237e-09
MIR600HG	SLITRK2	protein_coding	0.425	2.28625e-09
MIR600HG	SMIM27	protein_coding	0.425	2.28795e-09
MIR600HG	ZBTB32	protein_coding	0.425	2.3026e-09
MIR600HG	CCRL2	protein_coding	-0.425	2.30769e-09
MIR600HG	C15orf48	protein_coding	-0.425	2.31148e-09
MIR600HG	ZNF483	protein_coding	0.425	2.31171e-09
MIR600HG	SYTL2	protein_coding	-0.425	2.31847e-09
MIR600HG	APP	protein_coding	-0.424	2.37303e-09
MIR600HG	TMEM126A	protein_coding	-0.424	2.37498e-09
MIR600HG	ZFP91	protein_coding	-0.424	2.38043e-09
MIR600HG	COPS2	protein_coding	-0.424	2.39307e-09
MIR600HG	CERS4	protein_coding	0.424	2.39456e-09
MIR600HG	GTF2H4	protein_coding	0.424	2.40189e-09
MIR600HG	FADD	protein_coding	-0.424	2.42339e-09
MIR600HG	KIF11	protein_coding	-0.424	2.44994e-09
MIR600HG	VDAC2	protein_coding	-0.424	2.47705e-09
MIR600HG	ZSCAN18	protein_coding	0.424	2.49885e-09
MIR600HG	KCNT1	protein_coding	0.424	2.52682e-09
MIR600HG	EHD2	protein_coding	-0.424	2.53199e-09
MIR600HG	CUX2	protein_coding	0.424	2.53879e-09
MIR600HG	TGM2	protein_coding	-0.424	2.55532e-09
MIR600HG	NPAS2	protein_coding	-0.423	2.58084e-09
MIR600HG	ORMDL2	protein_coding	-0.423	2.59257e-09
MIR600HG	GLMP	protein_coding	-0.423	2.6393e-09
MIR600HG	IER3	protein_coding	-0.423	2.65823e-09
MIR600HG	TRMO	protein_coding	0.423	2.66719e-09
MIR600HG	PML	protein_coding	-0.423	2.67117e-09
MIR600HG	KIF13B	protein_coding	-0.423	2.78815e-09
MIR600HG	VILL	protein_coding	-0.423	2.79369e-09
MIR600HG	PRRG4	protein_coding	-0.423	2.79678e-09
MIR600HG	CD22	protein_coding	0.423	2.82116e-09
MIR600HG	CCPG1	protein_coding	-0.422	2.83625e-09
MIR600HG	ZDHHC17	protein_coding	0.422	2.85452e-09
MIR600HG	SEC11A	protein_coding	-0.422	2.85575e-09
MIR600HG	TNFRSF13C	protein_coding	0.422	2.86085e-09
MIR600HG	SLC16A3	protein_coding	-0.422	2.90577e-09
MIR600HG	MYO5B	protein_coding	-0.422	2.9066e-09
MIR600HG	SORCS1	protein_coding	0.422	2.91438e-09
MIR600HG	HDHD2	protein_coding	0.422	2.92645e-09
MIR600HG	GZMM	protein_coding	0.422	3.0061e-09
MIR600HG	OSMR	protein_coding	-0.422	3.00654e-09
MIR600HG	TAS2R14	protein_coding	0.422	3.01758e-09
MIR600HG	SNAI3	protein_coding	0.422	3.01969e-09
MIR600HG	COLGALT1	protein_coding	-0.422	3.04874e-09
MIR600HG	XPNPEP1	protein_coding	-0.422	3.08155e-09
MIR600HG	TRIM5	protein_coding	-0.422	3.09596e-09
MIR600HG	LIPE	protein_coding	0.422	3.09916e-09
MIR600HG	ST6GALNAC1	protein_coding	-0.422	3.10588e-09
MIR600HG	STS	protein_coding	-0.421	3.12375e-09
MIR600HG	METTL5	protein_coding	-0.421	3.12479e-09
MIR600HG	RGS9	protein_coding	0.421	3.1277e-09
MIR600HG	IL18	protein_coding	-0.421	3.13188e-09
MIR600HG	AK9	protein_coding	0.421	3.16525e-09
MIR600HG	SCEL	protein_coding	-0.421	3.18472e-09
MIR600HG	C3orf62	protein_coding	0.421	3.18829e-09
MIR600HG	PHLDA1	protein_coding	-0.421	3.21381e-09
MIR600HG	ZNF506	protein_coding	0.421	3.23129e-09
MIR600HG	JUP	protein_coding	-0.421	3.23539e-09
MIR600HG	PRMT5	protein_coding	-0.421	3.23746e-09
MIR600HG	TOR4A	protein_coding	-0.421	3.25429e-09
MIR600HG	STX16	protein_coding	0.421	3.25564e-09
MIR600HG	TAF6L	protein_coding	0.421	3.30192e-09
MIR600HG	SHROOM3	protein_coding	-0.421	3.30229e-09
MIR600HG	CFL1	protein_coding	-0.421	3.32242e-09
MIR600HG	CBX6	protein_coding	0.421	3.33291e-09
MIR600HG	CDR2	protein_coding	-0.421	3.36583e-09
MIR600HG	APBB1	protein_coding	0.42	3.44175e-09
MIR600HG	ABHD2	protein_coding	-0.42	3.45241e-09
MIR600HG	TTC24	protein_coding	0.42	3.45787e-09
MIR600HG	RFLNA	protein_coding	-0.42	3.46106e-09
MIR600HG	CCDC84	protein_coding	0.42	3.46298e-09
MIR600HG	DUSP28	protein_coding	0.42	3.46484e-09
MIR600HG	ARPC5	protein_coding	-0.42	3.466e-09
MIR600HG	SLC35C1	protein_coding	-0.42	3.47922e-09
MIR600HG	CENPA	protein_coding	-0.42	3.56653e-09
MIR600HG	STKLD1	protein_coding	0.42	3.5886e-09
MIR600HG	BTBD17	protein_coding	0.42	3.60967e-09
MIR600HG	HNRNPAB	protein_coding	-0.42	3.67395e-09
MIR600HG	ESR2	protein_coding	0.42	3.69231e-09
MIR600HG	OTX1	protein_coding	-0.42	3.72134e-09
MIR600HG	SLFN14	protein_coding	0.42	3.73847e-09
MIR600HG	HK1	protein_coding	-0.419	3.77086e-09
MIR600HG	CKAP4	protein_coding	-0.419	3.78674e-09
MIR600HG	COPB1	protein_coding	-0.419	3.78869e-09
MIR600HG	SMIM15	protein_coding	-0.419	3.79684e-09
MIR600HG	CXCL5	protein_coding	-0.419	3.8018e-09
MIR600HG	CARD8	protein_coding	0.419	3.81517e-09
MIR600HG	TTK	protein_coding	-0.419	3.82201e-09
MIR600HG	IZUMO4	protein_coding	0.419	3.82372e-09
MIR600HG	KEL	protein_coding	0.419	3.84927e-09
MIR600HG	ACTN1	protein_coding	-0.419	3.86758e-09
MIR600HG	USPL1	protein_coding	0.419	3.89384e-09
MIR600HG	POMP	protein_coding	-0.419	3.93102e-09
MIR600HG	PIMREG	protein_coding	-0.419	3.95634e-09
MIR600HG	TFCP2L1	protein_coding	-0.419	3.9617e-09
MIR600HG	DPPA4	protein_coding	0.419	3.96417e-09
MIR600HG	MCF2L2	protein_coding	0.419	3.97137e-09
MIR600HG	ITPKA	protein_coding	-0.419	4.0119e-09
MIR600HG	COL3A1	protein_coding	-0.419	4.01604e-09
MIR600HG	ERCC6L	protein_coding	-0.419	4.03863e-09
MIR600HG	ZNF667	protein_coding	0.419	4.03938e-09
MIR600HG	PTER	protein_coding	-0.419	4.05327e-09
MIR600HG	SCNN1D	protein_coding	0.419	4.08489e-09
MIR600HG	PKP2	protein_coding	-0.419	4.08652e-09
MIR600HG	TYRO3	protein_coding	-0.419	4.0879e-09
MIR600HG	CCDC57	protein_coding	0.419	4.0984e-09
MIR600HG	MTMR7	protein_coding	0.418	4.13392e-09
MIR600HG	MGST3	protein_coding	-0.418	4.14652e-09
MIR600HG	CCDC116	protein_coding	0.418	4.21058e-09
MIR600HG	MRPL14	protein_coding	-0.418	4.28904e-09
MIR600HG	SNTN	protein_coding	-0.418	4.29766e-09
MIR600HG	ZWINT	protein_coding	-0.418	4.30153e-09
MIR600HG	PDCD6IP	protein_coding	-0.418	4.31755e-09
MIR600HG	TM2D2	protein_coding	-0.418	4.33479e-09
MIR600HG	AIMP2	protein_coding	-0.418	4.34586e-09
MIR600HG	ALDOA	protein_coding	-0.418	4.39069e-09
MIR600HG	MAP3K13	protein_coding	-0.418	4.46413e-09
MIR600HG	FAM118B	protein_coding	-0.418	4.48774e-09
MIR600HG	ORMDL1	protein_coding	0.418	4.49337e-09
MIR600HG	BRCC3	protein_coding	-0.418	4.50435e-09
MIR600HG	INPP4B	protein_coding	-0.418	4.50672e-09
MIR600HG	SULF2	protein_coding	-0.418	4.51843e-09
MIR600HG	AADAC	protein_coding	-0.417	4.53631e-09
MIR600HG	NKIRAS2	protein_coding	-0.417	4.55608e-09
MIR600HG	FAM120C	protein_coding	0.417	4.55731e-09
MIR600HG	ANXA10	protein_coding	-0.417	4.59922e-09
MIR600HG	NBPF20	protein_coding	0.417	4.62864e-09
MIR600HG	IGFL3	protein_coding	-0.417	4.64165e-09
MIR600HG	MTG1	protein_coding	0.417	4.6461e-09
MIR600HG	CST1	protein_coding	-0.417	4.65592e-09
MIR600HG	CSTB	protein_coding	-0.417	4.68398e-09
MIR600HG	ACTBL2	protein_coding	-0.417	4.70986e-09
MIR600HG	TPM3	protein_coding	-0.417	4.71511e-09
MIR600HG	TFF2	protein_coding	-0.417	4.71884e-09
MIR600HG	FGFR2	protein_coding	-0.417	4.75272e-09
MIR600HG	BEX4	protein_coding	0.417	4.77543e-09
MIR600HG	METTL7B	protein_coding	-0.417	4.77641e-09
MIR600HG	PCED1A	protein_coding	0.417	4.78642e-09
MIR600HG	PLAU	protein_coding	-0.417	4.80038e-09
MIR600HG	PRELID1	protein_coding	-0.417	4.80567e-09
MIR600HG	RHOA	protein_coding	-0.417	4.84875e-09
MIR600HG	PDP1	protein_coding	-0.417	4.85041e-09
MIR600HG	LY6G5C	protein_coding	0.417	4.90125e-09
MIR600HG	LHFPL2	protein_coding	-0.417	4.91293e-09
MIR600HG	FAM3C	protein_coding	-0.417	4.94331e-09
MIR600HG	BSN	protein_coding	0.417	4.9456e-09
MIR600HG	CRIPT	protein_coding	-0.417	4.95256e-09
MIR600HG	CLCN6	protein_coding	0.416	4.97814e-09
MIR600HG	BMPR1B	protein_coding	-0.416	4.999e-09
MIR600HG	C19orf71	protein_coding	0.416	5.02234e-09
MIR600HG	ADAM15	protein_coding	-0.416	5.03443e-09
MIR600HG	MTURN	protein_coding	0.416	5.04272e-09
MIR600HG	TOR1AIP2	protein_coding	-0.416	5.04787e-09
MIR600HG	NCL	protein_coding	-0.416	5.05596e-09
MIR600HG	GLIPR1L1	protein_coding	0.416	5.09496e-09
MIR600HG	WHRN	protein_coding	0.416	5.1042e-09
MIR600HG	PRSS22	protein_coding	-0.416	5.131e-09
MIR600HG	YWHAB	protein_coding	-0.416	5.13275e-09
MIR600HG	RAB31	protein_coding	-0.416	5.13653e-09
MIR600HG	DPAGT1	protein_coding	-0.416	5.15383e-09
MIR600HG	GREM1	protein_coding	-0.416	5.1791e-09
MIR600HG	EIF2S2	protein_coding	-0.416	5.193e-09
MIR600HG	NRAS	protein_coding	-0.416	5.22377e-09
MIR600HG	DKK4	protein_coding	-0.416	5.28731e-09
MIR600HG	SERP1	protein_coding	-0.416	5.30993e-09
MIR600HG	PON2	protein_coding	-0.416	5.35335e-09
MIR600HG	DNAJC13	protein_coding	-0.416	5.35455e-09
MIR600HG	ZNF382	protein_coding	0.416	5.42981e-09
MIR600HG	ARF1	protein_coding	-0.415	5.47915e-09
MIR600HG	DCTN5	protein_coding	-0.415	5.52346e-09
MIR600HG	FAM120A	protein_coding	-0.415	5.53394e-09
MIR600HG	FUT10	protein_coding	-0.415	5.54618e-09
MIR600HG	STX19	protein_coding	-0.415	5.59327e-09
MIR600HG	ZNF607	protein_coding	0.415	5.66552e-09
MIR600HG	IKZF4	protein_coding	0.415	5.67225e-09
MIR600HG	SLC7A7	protein_coding	-0.415	5.71367e-09
MIR600HG	TAS2R10	protein_coding	0.415	5.78134e-09
MIR600HG	ADI1	protein_coding	-0.415	5.7995e-09
MIR600HG	CXCL8	protein_coding	-0.415	5.84422e-09
MIR600HG	NAGA	protein_coding	-0.415	5.87793e-09
MIR600HG	TRIM21	protein_coding	-0.415	5.91534e-09
MIR600HG	ZNF224	protein_coding	0.414	5.99467e-09
MIR600HG	IRS1	protein_coding	-0.414	6.00786e-09
MIR600HG	CNNM4	protein_coding	-0.414	6.02087e-09
MIR600HG	AL133352.1	protein_coding	0.414	6.1428e-09
MIR600HG	AKR1B10	protein_coding	-0.414	6.14511e-09
MIR600HG	CKS2	protein_coding	-0.414	6.18973e-09
MIR600HG	MRPL13	protein_coding	-0.414	6.19401e-09
MIR600HG	KNL1	protein_coding	-0.414	6.24501e-09
MIR600HG	NCAPH	protein_coding	-0.414	6.24981e-09
MIR600HG	FOSL2	protein_coding	-0.414	6.27193e-09
MIR600HG	PROZ	protein_coding	0.414	6.32283e-09
MIR600HG	GRAP	protein_coding	0.414	6.47267e-09
MIR600HG	PRSS16	protein_coding	-0.413	6.57939e-09
MIR600HG	LOX	protein_coding	-0.413	6.60639e-09
MIR600HG	SSH3	protein_coding	-0.413	6.61193e-09
MIR600HG	FLYWCH1	protein_coding	0.413	6.63256e-09
MIR600HG	MUC5AC	protein_coding	-0.413	6.68187e-09
MIR600HG	TTLL5	protein_coding	-0.413	6.7314e-09
MIR600HG	LMNA	protein_coding	-0.413	6.77874e-09
MIR600HG	RSAD1	protein_coding	0.413	6.7812e-09
MIR600HG	IBSP	protein_coding	-0.413	6.80547e-09
MIR600HG	SNX15	protein_coding	0.413	6.81902e-09
MIR600HG	AURKA	protein_coding	-0.413	6.85631e-09
MIR600HG	TNFRSF1A	protein_coding	-0.413	6.87175e-09
MIR600HG	NRP2	protein_coding	-0.413	6.89032e-09
MIR600HG	SDHD	protein_coding	-0.413	7.11637e-09
MIR600HG	AGAP4	protein_coding	0.412	7.20617e-09
MIR600HG	ELF3	protein_coding	-0.412	7.21647e-09
MIR600HG	DSC2	protein_coding	-0.412	7.27441e-09
MIR600HG	TTLL12	protein_coding	-0.412	7.28117e-09
MIR600HG	CD109	protein_coding	-0.412	7.30341e-09
MIR600HG	NEK6	protein_coding	-0.412	7.31435e-09
MIR600HG	CASP7	protein_coding	-0.412	7.36659e-09
MIR600HG	CACNA2D2	protein_coding	0.412	7.4175e-09
MIR600HG	SYTL5	protein_coding	-0.412	7.48181e-09
MIR600HG	SRPX2	protein_coding	-0.412	7.52493e-09
MIR600HG	PLA2G4A	protein_coding	-0.412	7.52932e-09
MIR600HG	PHF10	protein_coding	0.412	7.61168e-09
MIR600HG	CTXN2	protein_coding	0.412	7.67707e-09
MIR600HG	SERPINA9	protein_coding	0.412	7.78815e-09
MIR600HG	OGFOD2	protein_coding	0.412	7.80506e-09
MIR600HG	RCC1	protein_coding	-0.412	7.83607e-09
MIR600HG	DPY30	protein_coding	-0.412	7.88109e-09
MIR600HG	ITGB1	protein_coding	-0.411	7.91944e-09
MIR600HG	CBLC	protein_coding	-0.411	7.92703e-09
MIR600HG	RAD51	protein_coding	-0.411	8.02457e-09
MIR600HG	PARP15	protein_coding	0.411	8.05103e-09
MIR600HG	BMS1	protein_coding	-0.411	8.05932e-09
MIR600HG	MAP4	protein_coding	-0.411	8.0739e-09
MIR600HG	CDS1	protein_coding	-0.411	8.12648e-09
MIR600HG	LEAP2	protein_coding	0.411	8.15395e-09
MIR600HG	SNAP23	protein_coding	-0.411	8.21514e-09
MIR600HG	ZNF75D	protein_coding	0.411	8.21991e-09
MIR600HG	PLA2G4F	protein_coding	-0.411	8.26632e-09
MIR600HG	TNFSF10	protein_coding	-0.411	8.34344e-09
MIR600HG	SLC22A18AS	protein_coding	-0.411	8.3947e-09
MIR600HG	TNS2	protein_coding	0.411	8.39622e-09
MIR600HG	PLSCR1	protein_coding	-0.411	8.41582e-09
MIR600HG	ARL13A	protein_coding	0.411	8.41771e-09
MIR600HG	DEFB1	protein_coding	-0.411	8.45045e-09
MIR600HG	CD3EAP	protein_coding	-0.411	8.50267e-09
MIR600HG	BIRC5	protein_coding	-0.411	8.52931e-09
MIR600HG	ATP6V0E2	protein_coding	0.411	8.53383e-09
MIR600HG	IFNGR2	protein_coding	-0.411	8.56497e-09
MIR600HG	SMNDC1	protein_coding	-0.411	8.56653e-09
MIR600HG	MFSD9	protein_coding	-0.411	8.62509e-09
MIR600HG	TP53TG5	protein_coding	0.41	8.66431e-09
MIR600HG	SYNGAP1	protein_coding	0.41	8.70294e-09
MIR600HG	FAM25A	protein_coding	-0.41	8.75365e-09
MIR600HG	NIPAL1	protein_coding	-0.41	8.76952e-09
MIR600HG	PPP1R14B	protein_coding	-0.41	8.79175e-09
MIR600HG	WSCD1	protein_coding	0.41	8.97153e-09
MIR600HG	GIMAP1	protein_coding	0.41	9.00478e-09
MIR600HG	RAB11FIP3	protein_coding	0.41	9.16335e-09
MIR600HG	SERPINB1	protein_coding	-0.41	9.27425e-09
MIR600HG	LENG8	protein_coding	0.41	9.31419e-09
MIR600HG	PLEKHN1	protein_coding	-0.41	9.36996e-09
MIR600HG	KDM4B	protein_coding	0.41	9.37978e-09
MIR600HG	TBC1D2	protein_coding	-0.409	9.47221e-09
MIR600HG	C18orf32	protein_coding	0.409	9.48435e-09
MIR600HG	ANO10	protein_coding	-0.409	9.54652e-09
MIR600HG	NCK1	protein_coding	-0.409	9.55871e-09
MIR600HG	SDHC	protein_coding	-0.409	9.56886e-09
MIR600HG	EIF4EBP1	protein_coding	-0.409	9.6038e-09
MIR600HG	NCOA5	protein_coding	0.409	9.74898e-09
MIR600HG	BTLA	protein_coding	0.409	9.75728e-09
MIR600HG	CLEC5A	protein_coding	-0.409	9.8051e-09
MIR600HG	TNIK	protein_coding	-0.409	9.82031e-09
MIR600HG	FARSB	protein_coding	-0.409	9.82491e-09
MIR600HG	RTP4	protein_coding	-0.409	9.84248e-09
MIR600HG	COL1A1	protein_coding	-0.409	9.8635e-09
MIR600HG	ZNF80	protein_coding	0.409	9.90414e-09
MIR600HG	SLC16A11	protein_coding	0.409	9.97413e-09
MIR600HG	SZT2	protein_coding	0.409	1.00524e-08
MIR600HG	ST8SIA2	protein_coding	-0.409	1.00737e-08
MIR600HG	GINS1	protein_coding	-0.408	1.03895e-08
MIR600HG	ARMCX4	protein_coding	0.408	1.04015e-08
MIR600HG	SCML2	protein_coding	0.408	1.04388e-08
MIR600HG	SLC2A1	protein_coding	-0.408	1.04427e-08
MIR600HG	POSTN	protein_coding	-0.408	1.04769e-08
MIR600HG	ANXA1	protein_coding	-0.408	1.05087e-08
MIR600HG	TMEM189	protein_coding	-0.408	1.05102e-08
MIR600HG	SERPINB7	protein_coding	-0.408	1.05351e-08
MIR600HG	MAPK12	protein_coding	0.408	1.05587e-08
MIR600HG	AKAP17A	protein_coding	0.408	1.0646e-08
MIR600HG	ZNF431	protein_coding	0.408	1.07329e-08
MIR600HG	METTL16	protein_coding	0.408	1.07477e-08
MIR600HG	PARPBP	protein_coding	-0.408	1.08818e-08
MIR600HG	SH3BGRL3	protein_coding	-0.408	1.10718e-08
MIR600HG	DNMT3A	protein_coding	0.408	1.10738e-08
MIR600HG	NSUN6	protein_coding	0.408	1.10797e-08
MIR600HG	DCUN1D1	protein_coding	-0.408	1.11182e-08
MIR600HG	SAFB	protein_coding	0.408	1.11552e-08
MIR600HG	FBXO28	protein_coding	-0.408	1.11803e-08
MIR600HG	AARSD1	protein_coding	0.408	1.121e-08
MIR600HG	PPP1R32	protein_coding	0.408	1.12116e-08
MIR600HG	ANKK1	protein_coding	0.408	1.13359e-08
MIR600HG	AAMP	protein_coding	-0.407	1.1345e-08
MIR600HG	TXNRD3	protein_coding	-0.407	1.13635e-08
MIR600HG	GOLGA8A	protein_coding	0.407	1.17007e-08
MIR600HG	DGKZ	protein_coding	0.407	1.17384e-08
MIR600HG	ZNF793	protein_coding	0.407	1.17955e-08
MIR600HG	RNPEP	protein_coding	-0.407	1.18317e-08
MIR600HG	ZNF732	protein_coding	0.407	1.18417e-08
MIR600HG	SMCR8	protein_coding	0.407	1.18858e-08
MIR600HG	CAPN1	protein_coding	-0.407	1.1955e-08
MIR600HG	CACNA1A	protein_coding	0.407	1.20519e-08
MIR600HG	TSPAN32	protein_coding	0.407	1.20737e-08
MIR600HG	UBE2O	protein_coding	0.407	1.20831e-08
MIR600HG	ASIC3	protein_coding	0.407	1.21939e-08
[truncated: 173 more rows]
